# Supplementary material for: Enhancing acid–base–water ternary aerosol nucleation with organic acid: a case of tartaric acid
Source: Royal Society of Chemistry journal article supplement (doi:10.1039/d3cp00809f), 2023-01-01
Supplement: d3cp00809f1.pdf [file d3cp00809f1.pdf]

*Supplement of*

**Enhancing acid-base-water ternary aerosol nucleation with organic acid: a case of tartaric acid**

**Chunyu Wang et al.**

*Correspondence to:* Renyi Zhang ([renyi-zhang@tamu.edu](mailto:renyi-zhang@tamu.edu)) and Shuai Jiang ([shuaijiang@ustc.edu.cn](mailto:shuaijiang@ustc.edu.cn))

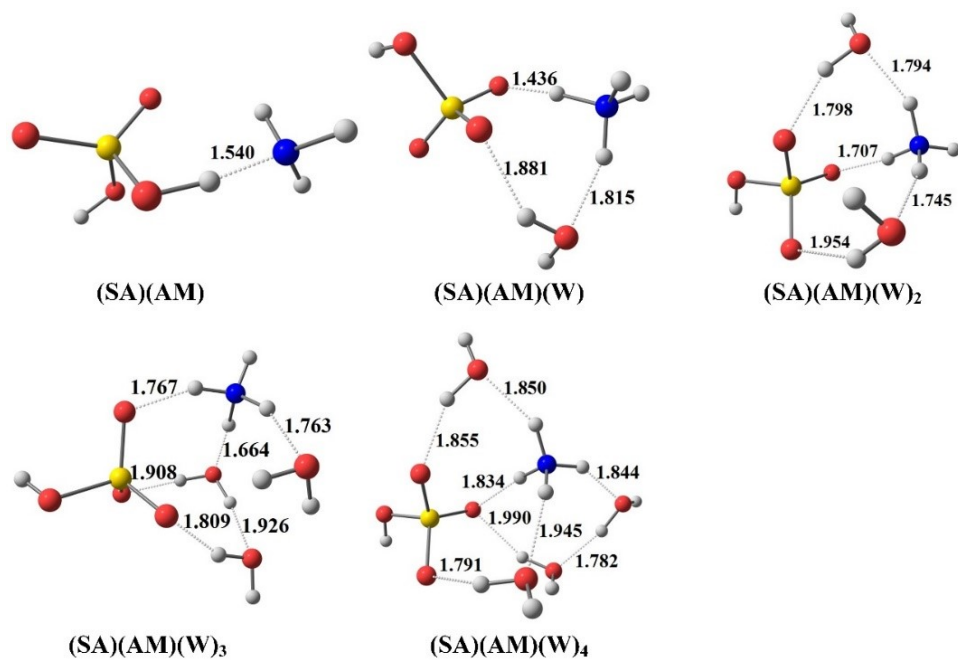

FIG. S1. Most stable configurations with hydrogen bonds and bond lengths ( $\text{\AA}$ ) of the hydrated (SA)(AM) clusters with 0-4 water molecules.

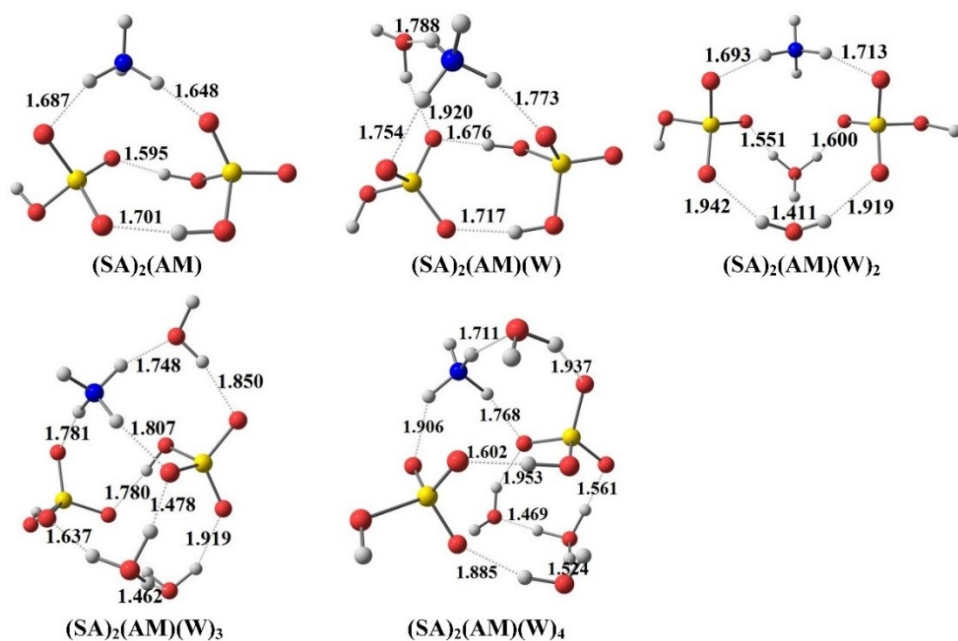

FIG. S2. Most stable configurations with hydrogen bonds and bond lengths ( $\text{\AA}$ ) of the hydrated (SA)<sub>2</sub>(AM) clusters with 0-4 water molecules.

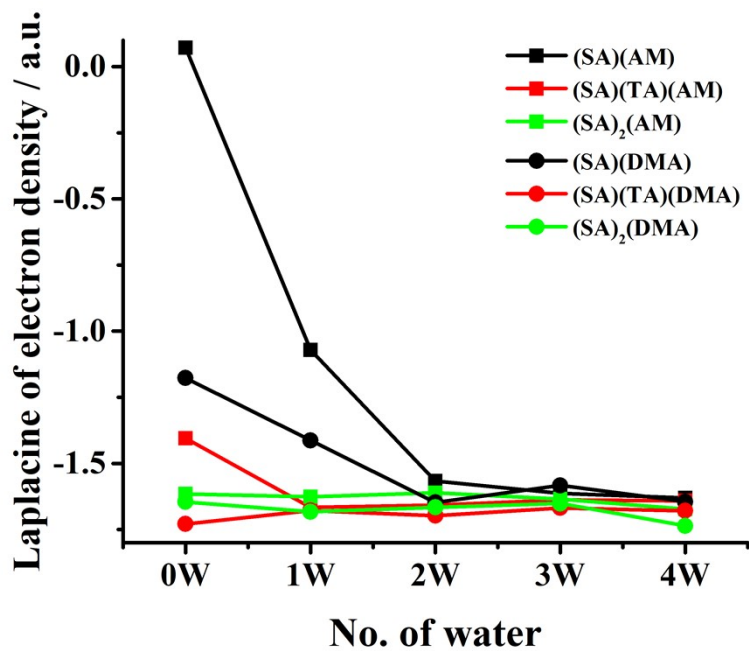

FIG. S3. Laplacian of electron densities at BCPs of the nitrogen-hydrogen bond in the clusters (a.u.).

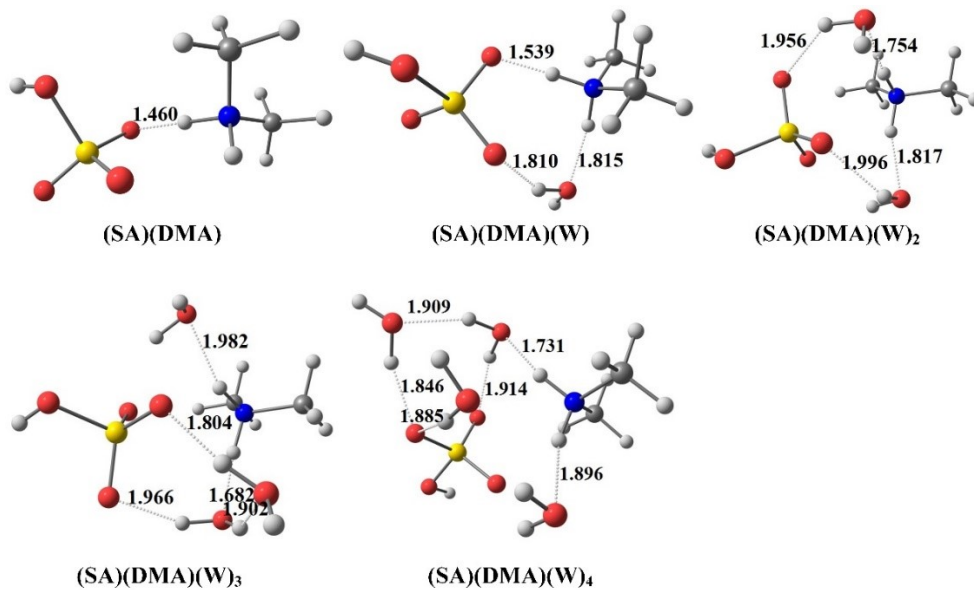

FIG. S4. Most stable configurations with hydrogen bonds and bond lengths (Å) of the hydrated (SA)(DMA) clusters with 0-4 water molecules.

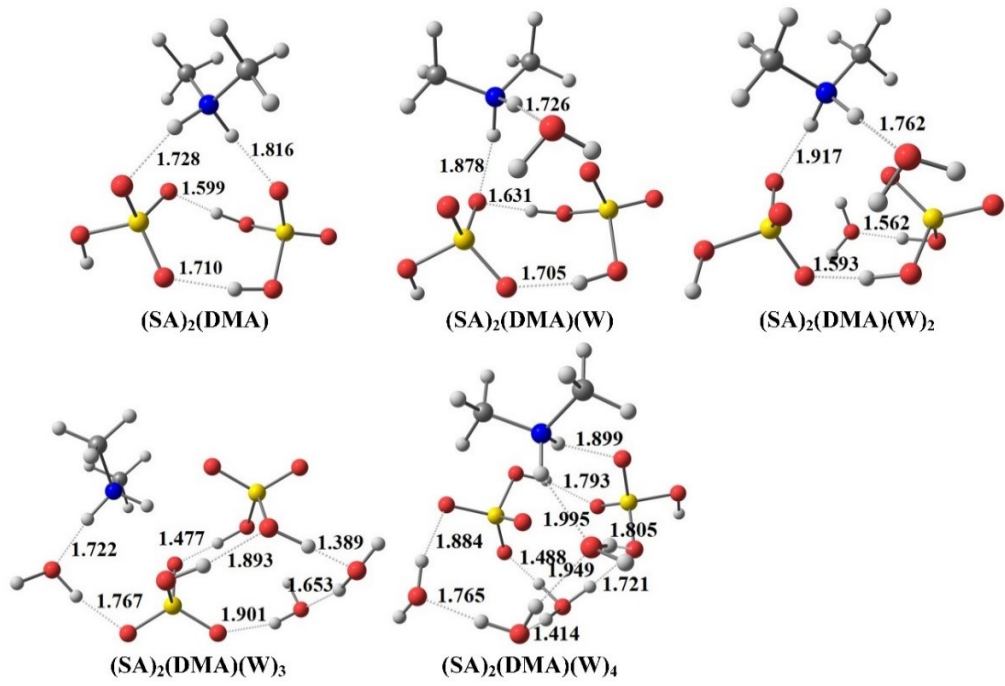

**FIG. S5.** Most stable configurations with hydrogen bonds and bond lengths (Å) of the hydrated (SA)<sub>2</sub>(DMA) clusters with 0-4 water molecules.

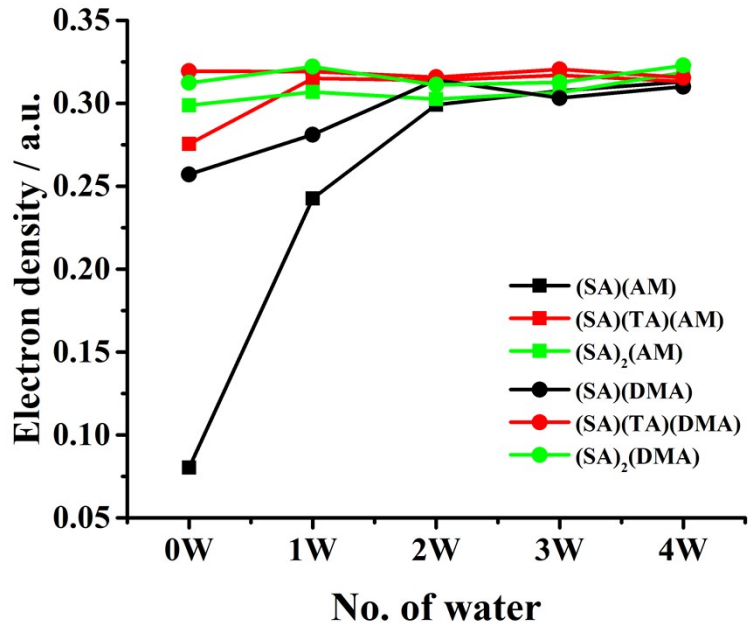

**FIG. S6.** Electron densities at BCPs of the nitrogen-hydrogen bond in the clusters (a.u.).

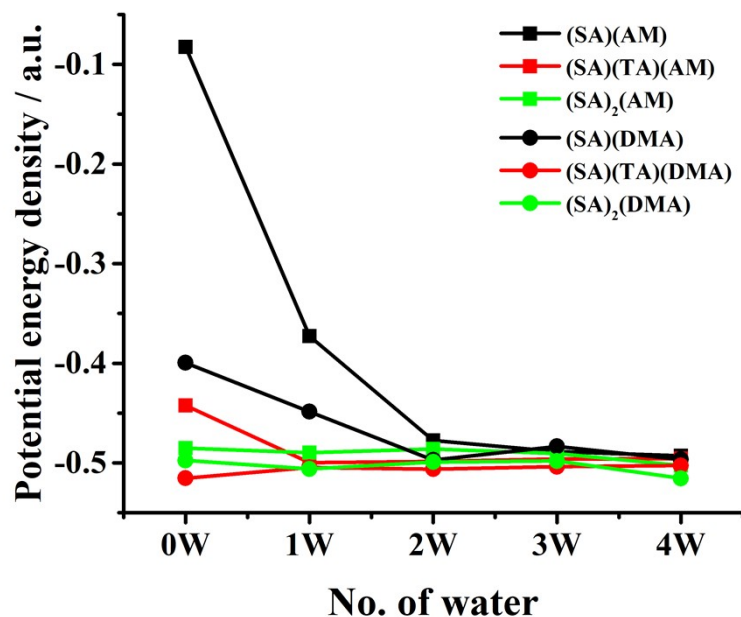

**FIG. S7.** Potential energy densities at BCPs of the nitrogen-hydrogen bond in the clusters (a.u.).

**Table S1.** Laplacian bond order (LBO) of the newly formed covalent bond (nitrogen-hydrogen bond) between in the clusters (a.u.).

| Clusters                | Bonds | No. of water molecules |       |       |       |       |
|-------------------------|-------|------------------------|-------|-------|-------|-------|
|                         |       | 0                      | 1     | 2     | 3     | 4     |
| (SA)(AM)                | N1-H1 | -                      | 0.338 | 0.542 | 0.575 | 0.592 |
| (SA)(TA)(AM)            | N1-H1 | 0.458                  | 0.601 | 0.593 | 0.581 | 0.589 |
| (SA) <sub>2</sub> (AM)  | N1-H1 | 0.546                  | 0.573 | 0.555 | 0.578 | 0.609 |
| (SA)(DMA)               | N2-H2 | 0.366                  | 0.451 | 0.575 | 0.540 | 0.561 |
| (SA)(TA)(DMA)           | N2-H2 | 0.592                  | 0.593 | 0.619 | 0.595 | 0.585 |
| (SA) <sub>2</sub> (DMA) | N2-H2 | 0.566                  | 0.600 | 0.605 | 0.578 | 0.607 |

Note: N1 and N2 are the nitrogen atoms on the AM molecule and DMA molecule, respectively; H1 and H2 are the hydrogen atoms on one of the hydroxyl functions of the SA molecule that bound to N1 and N2, respectively.

**Table S2.** Coordinates of optimized global free energy minima obtained at the M06-2X/6-311+G(2d,p) level of theory for monomers, (SA)(B)(W)<sub>n</sub>, (SA)(TA)(W)<sub>n</sub>, (SA)<sub>2</sub>(B)(W)<sub>n</sub> and (SA)(TA)(B)(W)<sub>n</sub> ( $n = 0-4$ ).

SA

S      0.000029000000      0.000121000000      -0.158793000000

|   |                 |                 |                 |
|---|-----------------|-----------------|-----------------|
| O | 0.665675000000  | -1.063976000000 | -0.821141000000 |
| O | -0.664876000000 | 1.065610000000  | -0.819645000000 |
| O | -1.022927000000 | -0.686827000000 | 0.840425000000  |
| O | 1.022185000000  | 0.685212000000  | 0.842506000000  |
| H | -1.688675000000 | -0.033684000000 | 1.101085000000  |
| H | 1.687748000000  | 0.031588000000  | 1.102437000000  |

### TA

|   |                 |                 |                 |
|---|-----------------|-----------------|-----------------|
| O | 0.164037000000  | 1.468084000000  | 0.793542000000  |
| O | -0.164215000000 | -1.468158000000 | 0.793178000000  |
| O | 2.256164000000  | -0.659849000000 | -1.167300000000 |
| O | -2.256037000000 | 0.660299000000  | -1.167053000000 |
| O | 2.610841000000  | 0.399912000000  | 0.775928000000  |
| O | -2.610781000000 | -0.400335000000 | 0.775691000000  |
| C | 0.468021000000  | 0.610280000000  | -0.263993000000 |
| C | -0.467975000000 | -0.610191000000 | -0.264220000000 |
| C | 1.896236000000  | 0.118978000000  | -0.143558000000 |
| C | -1.896204000000 | -0.118986000000 | -0.143720000000 |
| H | 0.357324000000  | 1.140218000000  | -1.215308000000 |
| H | -0.357266000000 | -1.139932000000 | -1.215646000000 |
| H | 0.871731000000  | 1.388898000000  | 1.448484000000  |
| H | -0.872440000000 | -1.389644000000 | 1.447612000000  |
| H | 3.158944000000  | -0.967702000000 | -1.002217000000 |
| H | -3.158832000000 | 0.968059000000  | -1.001874000000 |

### AM

|   |                 |                 |                 |
|---|-----------------|-----------------|-----------------|
| N | 0.000000000000  | 0.000000000000  | 0.112976000000  |
| H | 0.000000000000  | 0.941219000000  | -0.263611000000 |
| H | -0.815120000000 | -0.470610000000 | -0.263611000000 |
| H | 0.815120000000  | -0.470610000000 | -0.263611000000 |

### DMA

|   |                 |                 |                 |
|---|-----------------|-----------------|-----------------|
| C | -0.026944000000 | -0.224033000000 | 1.204850000000  |
| N | -0.026944000000 | 0.589628000000  | 0.000000000000  |
| C | -0.026944000000 | -0.224033000000 | -1.204850000000 |
| H | 0.029053000000  | 0.416428000000  | 2.085079000000  |
| H | 0.798251000000  | -0.950916000000 | 1.244120000000  |
| H | -0.964643000000 | -0.781658000000 | 1.257343000000  |
| H | 0.786622000000  | 1.193300000000  | 0.000000000000  |
| H | 0.029053000000  | 0.416428000000  | -2.085079000000 |
| H | -0.964643000000 | -0.781658000000 | -1.257343000000 |
| H | 0.798251000000  | -0.950916000000 | -1.244120000000 |

### W

|   |                |                 |                 |
|---|----------------|-----------------|-----------------|
| O | 0.000000000000 | 0.000000000000  | 0.116481000000  |
| H | 0.000000000000 | 0.763464000000  | -0.465925000000 |
| H | 0.000000000000 | -0.763464000000 | -0.465925000000 |

**(TA)(AM)**

|   |                 |                 |                 |
|---|-----------------|-----------------|-----------------|
| O | -0.564212000000 | -1.178859000000 | 1.128659000000  |
| O | -0.635462000000 | 1.682931000000  | 0.472047000000  |
| O | -2.839671000000 | 0.072200000000  | -1.323241000000 |
| O | 1.804397000000  | -0.474559000000 | -0.975482000000 |
| O | -3.129870000000 | -0.488859000000 | 0.825937000000  |
| O | 1.925193000000  | 1.047317000000  | 0.668528000000  |
| C | -0.929777000000 | -0.638704000000 | -0.106051000000 |
| C | -0.180265000000 | 0.674824000000  | -0.380950000000 |
| C | -2.417518000000 | -0.355484000000 | -0.128226000000 |
| C | 1.304826000000  | 0.436189000000  | -0.171952000000 |
| H | -0.691826000000 | -1.351892000000 | -0.900413000000 |
| H | -0.344399000000 | 0.961855000000  | -1.424665000000 |
| H | -1.272491000000 | -0.976308000000 | 1.754877000000  |
| H | 0.092184000000  | 1.886186000000  | 1.077542000000  |
| H | -3.782136000000 | 0.277497000000  | -1.244288000000 |
| H | 2.781188000000  | -0.613157000000 | -0.739419000000 |
| N | 4.318534000000  | -0.633768000000 | -0.078945000000 |
| H | 4.593845000000  | -1.480372000000 | 0.406979000000  |
| H | 5.103924000000  | -0.334864000000 | -0.646470000000 |
| H | 4.143386000000  | 0.085122000000  | 0.619957000000  |

**(TA)(DMA)**

|   |                 |                 |                 |
|---|-----------------|-----------------|-----------------|
| O | 1.113008000000  | -1.492222000000 | -0.444891000000 |
| O | 1.410419000000  | 1.359041000000  | -1.140931000000 |
| O | 3.610354000000  | 0.541167000000  | 1.099711000000  |
| O | -1.089464000000 | 0.221345000000  | 1.127894000000  |
| O | 3.728250000000  | -0.947796000000 | -0.569877000000 |
| O | -1.184482000000 | 0.888393000000  | -1.009231000000 |
| C | 1.588500000000  | -0.485708000000 | 0.400033000000  |
| C | 0.933329000000  | 0.866461000000  | 0.076374000000  |
| C | 3.087755000000  | -0.343118000000 | 0.242837000000  |
| C | -0.571391000000 | 0.661233000000  | 0.012167000000  |
| H | 1.361722000000  | -0.745339000000 | 1.437685000000  |
| H | 1.159290000000  | 1.570495000000  | 0.883771000000  |
| H | 1.790551000000  | -1.650742000000 | -1.116409000000 |
| H | 0.662103000000  | 1.345425000000  | -1.755801000000 |
| H | 4.554848000000  | 0.616413000000  | 0.902572000000  |
| H | -2.102281000000 | -0.000027000000 | 0.980506000000  |
| C | -4.274192000000 | 0.754459000000  | 0.095954000000  |
| N | -3.556804000000 | -0.413563000000 | 0.615697000000  |

|   |                 |                 |                 |
|---|-----------------|-----------------|-----------------|
| C | -3.399861000000 | -1.458182000000 | -0.402986000000 |
| H | -4.409521000000 | 1.485267000000  | 0.892626000000  |
| H | -5.252796000000 | 0.485726000000  | -0.315181000000 |
| H | -3.666561000000 | 1.202853000000  | -0.690137000000 |
| H | -4.056986000000 | -0.792397000000 | 1.413459000000  |
| H | -2.882356000000 | -2.313718000000 | 0.029725000000  |
| H | -2.787514000000 | -1.055621000000 | -1.210166000000 |
| H | -4.362381000000 | -1.783701000000 | -0.810214000000 |

**(SA)(TA)**

|   |                 |                 |                 |
|---|-----------------|-----------------|-----------------|
| O | 2.241924000000  | 1.611742000000  | -0.120935000000 |
| O | 2.194938000000  | -0.751900000000 | 1.568094000000  |
| O | 4.545224000000  | -1.063301000000 | -0.656774000000 |
| O | -0.040895000000 | -0.571563000000 | -1.191062000000 |
| O | 4.807990000000  | 0.983712000000  | 0.219125000000  |
| O | -0.318857000000 | -0.067524000000 | 0.977743000000  |
| C | 2.637908000000  | 0.342286000000  | -0.546098000000 |
| C | 1.842954000000  | -0.728709000000 | 0.221015000000  |
| C | 4.115558000000  | 0.141014000000  | -0.277077000000 |
| C | 0.369590000000  | -0.426551000000 | 0.039592000000  |
| H | 2.458766000000  | 0.221503000000  | -1.620163000000 |
| H | 2.052475000000  | -1.708548000000 | -0.213965000000 |
| H | 3.014490000000  | 2.045404000000  | 0.268529000000  |
| H | 1.648340000000  | -0.104697000000 | 2.032301000000  |
| H | 5.484447000000  | -1.131013000000 | -0.431599000000 |
| H | -1.000894000000 | -0.348884000000 | -1.271792000000 |
| S | -3.537270000000 | 0.159653000000  | -0.145026000000 |
| O | -4.777519000000 | 0.838204000000  | -0.253269000000 |
| O | -2.663389000000 | 0.018952000000  | -1.278502000000 |
| O | -2.752178000000 | 0.764534000000  | 1.040836000000  |
| O | -3.801182000000 | -1.336698000000 | 0.317630000000  |
| H | -1.791139000000 | 0.443229000000  | 1.023335000000  |
| H | -4.554679000000 | -1.348947000000 | 0.926087000000  |

**(SA)(W)**

|   |                 |                 |                 |
|---|-----------------|-----------------|-----------------|
| S | 0.578769000000  | -0.068624000000 | 0.131227000000  |
| O | -0.217148000000 | 0.364775000000  | 1.237408000000  |
| O | 1.756968000000  | -0.846471000000 | 0.293285000000  |
| O | -0.335934000000 | -0.803571000000 | -0.896046000000 |
| O | 0.967059000000  | 1.267019000000  | -0.637732000000 |
| H | -1.284378000000 | -0.520738000000 | -0.744751000000 |
| H | 1.716588000000  | 1.079572000000  | -1.220927000000 |
| O | -2.670846000000 | 0.094683000000  | -0.117309000000 |
| H | -2.295053000000 | 0.417331000000  | 0.714598000000  |



|   |                 |                 |                |
|---|-----------------|-----------------|----------------|
| H | -3.398252000000 | -0.489653000000 | 0.114596000000 |
|---|-----------------|-----------------|----------------|

**(SA)(AM)**

|   |                 |                 |                 |
|---|-----------------|-----------------|-----------------|
| S | 0.601066000000  | -0.113814000000 | -0.090640000000 |
| O | -0.103170000000 | -0.091658000000 | -1.335803000000 |
| O | 1.779915000000  | -0.890299000000 | 0.100650000000  |
| O | 0.983856000000  | 1.413447000000  | 0.183683000000  |
| O | -0.389861000000 | -0.428342000000 | 1.051868000000  |
| H | 1.715656000000  | 1.429298000000  | 0.815846000000  |
| H | -1.370170000000 | -0.231574000000 | 0.727923000000  |
| N | -2.727527000000 | 0.040962000000  | 0.053754000000  |
| H | -2.448948000000 | 0.084766000000  | -0.924271000000 |
| H | -3.418227000000 | -0.694881000000 | 0.155077000000  |
| H | -3.168606000000 | 0.921503000000  | 0.296201000000  |

**(SA)(DMA)**

|   |                 |                 |                 |
|---|-----------------|-----------------|-----------------|
| S | -1.270827000000 | -0.175350000000 | 0.059219000000  |
| O | -0.574293000000 | 0.060312000000  | 1.311436000000  |
| O | -2.501363000000 | -0.908588000000 | 0.083311000000  |
| O | -1.646239000000 | 1.326500000000  | -0.421594000000 |
| O | -0.315071000000 | -0.657424000000 | -0.976980000000 |
| H | -2.400183000000 | 1.253070000000  | -1.020699000000 |
| H | 1.015904000000  | -0.428880000000 | -0.422397000000 |
| C | 3.101826000000  | -0.893366000000 | -0.140133000000 |
| N | 1.893046000000  | -0.115490000000 | 0.173602000000  |
| C | 2.036484000000  | 1.343056000000  | -0.016366000000 |
| H | 2.897708000000  | -1.949372000000 | 0.020683000000  |
| H | 3.928784000000  | -0.573620000000 | 0.492727000000  |
| H | 3.359011000000  | -0.729990000000 | -1.184994000000 |
| H | 1.555128000000  | -0.288073000000 | 1.123661000000  |
| H | 1.087641000000  | 1.808767000000  | 0.243133000000  |
| H | 2.267866000000  | 1.533239000000  | -1.062749000000 |
| H | 2.835926000000  | 1.724345000000  | 0.617525000000  |

**(SA)(AM)(W)<sub>1</sub>**

|   |                 |                 |                 |
|---|-----------------|-----------------|-----------------|
| S | -0.843138000000 | -0.097706000000 | -0.046949000000 |
| O | -1.289221000000 | -1.246010000000 | -0.785053000000 |
| O | 0.098893000000  | -0.333523000000 | 1.041347000000  |
| O | -0.351513000000 | 1.008554000000  | -0.907568000000 |
| O | -2.134487000000 | 0.500680000000  | 0.693650000000  |
| H | 0.975948000000  | 1.344228000000  | -0.473497000000 |
| H | -2.909179000000 | 0.213808000000  | 0.192812000000  |
| N | 1.996765000000  | 1.432470000000  | -0.026911000000 |
| H | 2.558518000000  | 2.168323000000  | -0.442461000000 |

|   |                |                 |                 |
|---|----------------|-----------------|-----------------|
| H | 2.439339000000 | 0.501178000000  | -0.133353000000 |
| H | 1.867777000000 | 1.597888000000  | 0.969364000000  |
| O | 2.487133000000 | -1.301174000000 | 0.074216000000  |
| H | 1.599763000000 | -1.317207000000 | 0.478213000000  |
| H | 2.494255000000 | -2.000418000000 | -0.584256000000 |

**(SA)(AM)(W)<sub>2</sub>**

|   |                 |                 |                 |
|---|-----------------|-----------------|-----------------|
| S | -1.010219000000 | -0.102052000000 | 0.053407000000  |
| O | -0.098591000000 | -0.456509000000 | -1.029434000000 |
| O | -1.464197000000 | 1.277103000000  | 0.019606000000  |
| O | -2.295245000000 | -1.011998000000 | -0.232493000000 |
| O | -0.505483000000 | -0.511090000000 | 1.368014000000  |
| H | -3.027345000000 | -0.662949000000 | 0.293400000000  |
| H | 1.104189000000  | 0.049823000000  | 1.457806000000  |
| N | 2.038163000000  | 0.377418000000  | 1.106241000000  |
| H | 2.427037000000  | -0.418613000000 | 0.566237000000  |
| H | 1.837780000000  | 1.170490000000  | 0.449821000000  |
| H | 2.654143000000  | 0.663837000000  | 1.860030000000  |
| O | 2.272545000000  | -1.733527000000 | -0.644326000000 |
| H | 2.316166000000  | -2.688796000000 | -0.562533000000 |
| H | 1.351695000000  | -1.510625000000 | -0.887308000000 |
| O | 1.093869000000  | 2.240023000000  | -0.711409000000 |
| H | 1.048141000000  | 1.694020000000  | -1.506792000000 |
| H | 0.161362000000  | 2.261707000000  | -0.428522000000 |

**(SA)(AM)(W)<sub>3</sub>**

|   |                 |                 |                 |
|---|-----------------|-----------------|-----------------|
| S | 1.285153000000  | -0.015559000000 | -0.040244000000 |
| O | 1.173585000000  | -0.412845000000 | 1.352906000000  |
| O | 0.423755000000  | -0.775356000000 | -0.944788000000 |
| O | 1.194745000000  | 1.429629000000  | -0.241952000000 |
| O | 2.748834000000  | -0.440020000000 | -0.525172000000 |
| H | -0.447634000000 | 2.041763000000  | -0.034432000000 |
| H | 3.392359000000  | -0.005604000000 | 0.050789000000  |
| N | -1.475587000000 | 1.981037000000  | 0.121265000000  |
| H | -1.604249000000 | 1.351632000000  | 0.961478000000  |
| H | -1.897370000000 | 2.894365000000  | 0.252548000000  |
| H | -1.876107000000 | 1.472614000000  | -0.697721000000 |
| O | -1.821310000000 | -1.951705000000 | 0.075907000000  |
| H | -0.903426000000 | -1.763239000000 | -0.206372000000 |
| H | -1.887282000000 | -2.903182000000 | 0.191270000000  |
| O | -1.514159000000 | 0.072903000000  | 2.025090000000  |
| H | -0.555144000000 | -0.088817000000 | 2.089608000000  |
| H | -1.838201000000 | -0.714322000000 | 1.555649000000  |
| O | -2.084089000000 | 0.172364000000  | -1.865502000000 |

|   |                 |                 |                 |
|---|-----------------|-----------------|-----------------|
| H | -1.147412000000 | -0.060721000000 | -1.973632000000 |
| H | -2.439744000000 | -0.602564000000 | -1.406053000000 |

**(SA)(AM)(W)<sub>4</sub>**

|   |                 |                 |                 |
|---|-----------------|-----------------|-----------------|
| S | -1.457045000000 | -0.417530000000 | -0.187414000000 |
| O | -1.314205000000 | -1.525648000000 | 0.747954000000  |
| O | -1.591339000000 | 0.884719000000  | 0.433032000000  |
| O | -0.427454000000 | -0.447290000000 | -1.235980000000 |
| O | -2.858281000000 | -0.632477000000 | -0.926729000000 |
| H | 0.828643000000  | 0.731018000000  | -0.604311000000 |
| H | -2.905565000000 | -1.552115000000 | -1.221333000000 |
| N | 1.421787000000  | 1.258788000000  | 0.062238000000  |
| H | 2.401751000000  | 1.200954000000  | -0.251917000000 |
| H | 1.321059000000  | 0.774711000000  | 0.966995000000  |
| H | 1.048376000000  | 2.217545000000  | 0.122784000000  |
| O | 1.961330000000  | -1.808660000000 | -0.381638000000 |
| H | 1.100038000000  | -1.644968000000 | -0.798365000000 |
| H | 1.777066000000  | -1.798222000000 | 0.568350000000  |
| O | 0.925530000000  | -0.760158000000 | 2.094035000000  |
| H | 0.030670000000  | -1.069455000000 | 1.838683000000  |
| H | 0.971600000000  | -0.794746000000 | 3.052805000000  |
| O | 3.813979000000  | 0.140479000000  | -0.780838000000 |
| H | 4.474241000000  | 0.055063000000  | -1.471065000000 |
| H | 3.296874000000  | -0.691336000000 | -0.758619000000 |
| O | -0.402641000000 | 3.362922000000  | 0.201952000000  |
| H | -1.065773000000 | 2.650860000000  | 0.222375000000  |
| H | -0.774110000000 | 4.078569000000  | -0.317737000000 |

**(SA)(DMA)(W)<sub>1</sub>**

|   |                 |                 |                 |
|---|-----------------|-----------------|-----------------|
| S | 1.453582000000  | -0.060411000000 | -0.120417000000 |
| O | 0.702796000000  | 0.832254000000  | 0.758988000000  |
| O | 2.433410000000  | 0.541833000000  | -0.980840000000 |
| O | 2.271292000000  | -0.976969000000 | 0.922199000000  |
| O | 0.536960000000  | -0.992731000000 | -0.809436000000 |
| H | 3.101399000000  | -1.218986000000 | 0.492543000000  |
| H | -0.902979000000 | -0.627209000000 | -0.409183000000 |
| C | -2.892123000000 | -0.999949000000 | -0.952736000000 |
| N | -1.890976000000 | -0.331353000000 | -0.102802000000 |
| C | -2.036383000000 | -0.626698000000 | 1.338872000000  |
| H | -2.703259000000 | -0.742946000000 | -1.992537000000 |
| H | -3.892731000000 | -0.681252000000 | -0.665029000000 |
| H | -2.798057000000 | -2.076814000000 | -0.824480000000 |
| H | -1.915315000000 | 0.693955000000  | -0.233205000000 |
| H | -1.247822000000 | -0.098333000000 | 1.869014000000  |

|   |                 |                 |                 |
|---|-----------------|-----------------|-----------------|
| H | -1.926135000000 | -1.699731000000 | 1.486447000000  |
| H | -3.017584000000 | -0.300264000000 | 1.679914000000  |
| O | -1.370514000000 | 2.408203000000  | 0.010825000000  |
| H | -0.472085000000 | 2.115082000000  | 0.259666000000  |
| H | -1.266429000000 | 3.181709000000  | -0.547557000000 |

**(SA)(DMA)(W)<sub>2</sub>**

|   |                 |                 |                 |
|---|-----------------|-----------------|-----------------|
| S | -1.400243000000 | -0.001796000000 | 0.112885000000  |
| O | -0.995262000000 | 1.111949000000  | 0.958795000000  |
| O | -1.113794000000 | -1.298266000000 | 0.720146000000  |
| O | -2.994071000000 | 0.084697000000  | -0.045912000000 |
| O | -0.933252000000 | 0.112277000000  | -1.266358000000 |
| H | -3.384625000000 | -0.021572000000 | 0.832017000000  |
| H | 1.303325000000  | 0.844146000000  | -0.003720000000 |
| C | 3.187385000000  | 0.105834000000  | -0.328881000000 |
| N | 1.828835000000  | -0.020890000000 | 0.239315000000  |
| C | 1.810488000000  | -0.249753000000 | 1.702261000000  |
| H | 3.101252000000  | 0.297692000000  | -1.395657000000 |
| H | 3.730031000000  | -0.821835000000 | -0.158702000000 |
| H | 3.697992000000  | 0.937594000000  | 0.152177000000  |
| H | 1.351400000000  | -0.816260000000 | -0.244724000000 |
| H | 0.774769000000  | -0.325434000000 | 2.022686000000  |
| H | 2.301796000000  | 0.587674000000  | 2.194331000000  |
| H | 2.345714000000  | -1.173526000000 | 1.915717000000  |
| O | 0.761503000000  | 2.335925000000  | -0.889174000000 |
| H | 0.131963000000  | 1.795688000000  | -1.396358000000 |
| H | 0.201644000000  | 2.654335000000  | -0.168568000000 |
| O | 0.743749000000  | -2.205459000000 | -1.127220000000 |
| H | 0.042521000000  | -2.338492000000 | -0.465612000000 |
| H | 0.266036000000  | -1.710495000000 | -1.807438000000 |

**(SA)(DMA)(W)<sub>3</sub>**

|   |                 |                 |                 |
|---|-----------------|-----------------|-----------------|
| S | 1.526646000000  | -0.092678000000 | -0.141802000000 |
| O | 0.804938000000  | 0.144213000000  | 1.111191000000  |
| O | 1.839173000000  | 1.101533000000  | -0.901965000000 |
| O | 2.928443000000  | -0.676452000000 | 0.384412000000  |
| O | 0.905567000000  | -1.151548000000 | -0.932674000000 |
| H | 3.528232000000  | -0.729137000000 | -0.371980000000 |
| H | -1.103691000000 | -0.758652000000 | 0.338668000000  |
| C | -2.296417000000 | -1.326944000000 | -1.213647000000 |
| N | -1.843591000000 | -0.322901000000 | -0.229925000000 |
| C | -2.909118000000 | 0.163776000000  | 0.670536000000  |
| H | -1.438591000000 | -1.615150000000 | -1.816837000000 |
| H | -3.071055000000 | -0.886486000000 | -1.838522000000 |

|   |                 |                 |                 |
|---|-----------------|-----------------|-----------------|
| H | -2.682027000000 | -2.191092000000 | -0.675918000000 |
| H | -1.413963000000 | 0.500092000000  | -0.725474000000 |
| H | -2.484763000000 | 0.921996000000  | 1.326519000000  |
| H | -3.289587000000 | -0.676353000000 | 1.249086000000  |
| H | -3.707144000000 | 0.597183000000  | 0.070222000000  |
| O | -0.536105000000 | -2.489921000000 | 1.120106000000  |
| H | 0.104738000000  | -2.435446000000 | 0.392690000000  |
| H | -0.059928000000 | -2.088480000000 | 1.856120000000  |
| O | -0.594918000000 | 2.488409000000  | 1.354621000000  |
| H | -0.215592000000 | 3.220219000000  | 1.847044000000  |
| H | 0.061008000000  | 1.764455000000  | 1.384064000000  |
| O | -0.826703000000 | 1.942612000000  | -1.361105000000 |
| H | -0.788182000000 | 2.460164000000  | -0.537718000000 |
| H | 0.109399000000  | 1.768080000000  | -1.557668000000 |

**(SA)(DMA)(W)<sub>4</sub>**

|   |                 |                 |                 |
|---|-----------------|-----------------|-----------------|
| S | -1.563140000000 | -0.655395000000 | -0.068939000000 |
| O | -1.719056000000 | 0.553573000000  | 0.736256000000  |
| O | -0.519753000000 | -1.539617000000 | 0.433538000000  |
| O | -2.962310000000 | -1.399292000000 | 0.170676000000  |
| O | -1.465614000000 | -0.423819000000 | -1.503278000000 |
| H | -3.011233000000 | -2.145866000000 | -0.441115000000 |
| H | -0.334981000000 | 1.079791000000  | -1.855462000000 |
| C | 1.866503000000  | -1.294052000000 | -1.633335000000 |
| N | 1.962978000000  | -0.322983000000 | -0.524167000000 |
| C | 3.330339000000  | 0.161141000000  | -0.257385000000 |
| H | 0.818368000000  | -1.554679000000 | -1.762018000000 |
| H | 2.449891000000  | -2.178239000000 | -1.382751000000 |
| H | 2.254710000000  | -0.829711000000 | -2.538301000000 |
| H | 1.605744000000  | -0.748111000000 | 0.346698000000  |
| H | 3.281791000000  | 0.857385000000  | 0.576367000000  |
| H | 3.710933000000  | 0.659663000000  | -1.146982000000 |
| H | 3.961382000000  | -0.686352000000 | 0.003098000000  |
| O | 0.436554000000  | 1.642787000000  | -1.670252000000 |
| H | 0.089612000000  | 2.351915000000  | -1.104321000000 |
| H | 1.353003000000  | 0.493310000000  | -0.755505000000 |
| O | 1.738888000000  | -1.370084000000 | 2.132291000000  |
| H | 1.596205000000  | -0.475438000000 | 2.472169000000  |
| H | 0.846227000000  | -1.724524000000 | 2.017002000000  |
| O | 0.871188000000  | 1.268125000000  | 1.635167000000  |
| H | -0.026924000000 | 0.924211000000  | 1.480401000000  |
| H | 0.743867000000  | 2.223144000000  | 1.591957000000  |
| O | -0.913832000000 | 3.149120000000  | 0.310505000000  |
| H | -1.511397000000 | 3.896651000000  | 0.232107000000  |
| H | -1.467374000000 | 2.355187000000  | 0.423938000000  |

**(SA)(TA)(W)<sub>1</sub>**

|   |                 |                 |                 |
|---|-----------------|-----------------|-----------------|
| O | 2.322504000000  | -1.522447000000 | 1.055019000000  |
| O | 1.833421000000  | 1.310652000000  | 0.366283000000  |
| O | -0.022242000000 | -0.491189000000 | -1.419462000000 |
| O | 4.672565000000  | -0.484939000000 | -0.816897000000 |
| O | -0.284980000000 | -1.247580000000 | 0.675375000000  |
| O | 4.420475000000  | 1.060062000000  | 0.791093000000  |
| C | 1.921387000000  | -1.040783000000 | -0.189405000000 |
| C | 2.495949000000  | 0.362508000000  | -0.432307000000 |
| C | 0.410243000000  | -0.945352000000 | -0.275021000000 |
| C | 3.968366000000  | 0.364233000000  | -0.072840000000 |
| H | 2.273768000000  | -1.705755000000 | -0.984794000000 |
| H | 2.383038000000  | 0.623155000000  | -1.488105000000 |
| H | 1.539470000000  | -1.584949000000 | 1.619486000000  |
| H | 2.461080000000  | 1.623006000000  | 1.037141000000  |
| H | -1.015577000000 | -0.341582000000 | -1.384231000000 |
| H | 5.591369000000  | -0.465681000000 | -0.510905000000 |
| S | -3.344213000000 | -0.016239000000 | -0.029048000000 |
| O | -2.536482000000 | 0.114791000000  | -1.236441000000 |
| O | -4.752015000000 | 0.040587000000  | -0.140700000000 |
| O | -2.986019000000 | -1.374190000000 | 0.655257000000  |
| O | -2.833377000000 | 1.039099000000  | 0.981759000000  |
| H | -2.004514000000 | -1.433244000000 | 0.747443000000  |
| H | -1.995004000000 | 1.500465000000  | 0.634013000000  |
| O | -0.797193000000 | 2.229906000000  | 0.011600000000  |
| H | 0.118363000000  | 1.940246000000  | 0.172916000000  |
| H | -0.913518000000 | 2.262485000000  | -0.943850000000 |

**(SA)(TA)(W)<sub>2</sub>**

|   |                 |                 |                 |
|---|-----------------|-----------------|-----------------|
| O | 1.895581000000  | 0.837057000000  | 1.004283000000  |
| O | 2.554091000000  | -1.934349000000 | 0.232994000000  |
| O | 4.764139000000  | 0.040059000000  | -0.952222000000 |
| O | 0.074962000000  | -0.003400000000 | -1.438635000000 |
| O | 4.513914000000  | 0.594708000000  | 1.207496000000  |
| O | -0.079015000000 | -1.660920000000 | 0.065044000000  |
| C | 2.568369000000  | 0.443326000000  | -0.164833000000 |
| C | 2.082645000000  | -0.940619000000 | -0.622336000000 |
| C | 4.054187000000  | 0.374300000000  | 0.123247000000  |
| C | 0.566931000000  | -0.911918000000 | -0.641719000000 |
| H | 2.387156000000  | 1.172465000000  | -0.959114000000 |
| H | 2.443372000000  | -1.118103000000 | -1.640422000000 |
| H | 2.536496000000  | 0.832162000000  | 1.732172000000  |
| H | 1.802201000000  | -2.276175000000 | 0.736220000000  |
| H | 5.694184000000  | -0.028210000000 | -0.690890000000 |
| H | -0.916824000000 | 0.059555000000  | -1.326882000000 |

|   |                 |                 |                 |
|---|-----------------|-----------------|-----------------|
| S | -3.189961000000 | -0.397968000000 | 0.121596000000  |
| O | -2.490871000000 | 0.284955000000  | -0.974725000000 |
| O | -4.604524000000 | -0.347057000000 | 0.122400000000  |
| O | -2.775147000000 | -1.902754000000 | 0.072471000000  |
| O | -2.600667000000 | 0.102748000000  | 1.440126000000  |
| H | -1.789219000000 | -1.955295000000 | 0.095336000000  |
| H | -1.776134000000 | 0.774791000000  | 1.321108000000  |
| O | -1.688839000000 | 2.948279000000  | -1.043510000000 |
| H | -2.304248000000 | 2.226428000000  | -1.240496000000 |
| H | -2.188454000000 | 3.766958000000  | -1.097145000000 |
| O | -0.772601000000 | 1.716553000000  | 1.189357000000  |
| H | -0.963333000000 | 2.292146000000  | 0.418937000000  |
| H | 0.153202000000  | 1.423195000000  | 1.138861000000  |

**(SA)(TA)(W)<sub>3</sub>**

|   |                 |                 |                 |
|---|-----------------|-----------------|-----------------|
| O | 1.083870000000  | -0.721972000000 | 1.489545000000  |
| O | 1.559938000000  | 0.413873000000  | -1.241529000000 |
| O | 0.130144000000  | -2.257385000000 | -1.551491000000 |
| O | 4.220029000000  | -1.149552000000 | 0.463659000000  |
| O | -0.882388000000 | -2.323867000000 | 0.438136000000  |
| O | 3.636181000000  | 1.001979000000  | 0.262332000000  |
| C | 1.360856000000  | -1.469605000000 | 0.343989000000  |
| C | 2.201765000000  | -0.690926000000 | -0.682009000000 |
| C | 0.074374000000  | -2.053869000000 | -0.241674000000 |
| C | 3.417777000000  | -0.156088000000 | 0.055059000000  |
| H | 1.962738000000  | -2.328459000000 | 0.659549000000  |
| H | 2.545810000000  | -1.390795000000 | -1.451859000000 |
| H | 0.611184000000  | 0.099130000000  | 1.242657000000  |
| H | 0.601900000000  | 0.258755000000  | -1.346933000000 |
| H | -0.776617000000 | -2.460350000000 | -1.860751000000 |
| H | 4.947409000000  | -0.750965000000 | 0.962338000000  |
| S | -1.430782000000 | 1.506894000000  | -0.050774000000 |
| O | -1.125933000000 | 0.352061000000  | -0.936669000000 |
| O | -2.861637000000 | 1.609444000000  | 0.181005000000  |
| O | -0.617861000000 | 1.436789000000  | 1.168810000000  |
| O | -1.004332000000 | 2.796003000000  | -0.802794000000 |
| H | -1.387071000000 | 0.201736000000  | 2.556938000000  |
| H | -0.004137000000 | 2.955779000000  | -0.654023000000 |
| N | -3.408774000000 | -1.054201000000 | 0.747353000000  |
| H | -3.007143000000 | -1.629563000000 | -0.001795000000 |
| H | -4.326460000000 | -1.399323000000 | 1.011308000000  |
| H | -3.459217000000 | -0.068712000000 | 0.419700000000  |
| O | -1.637754000000 | -0.719223000000 | 2.738445000000  |
| H | -0.863329000000 | -1.218010000000 | 2.431510000000  |
| H | -2.742773000000 | -1.045440000000 | 1.578290000000  |
| O | -2.522899000000 | -1.637487000000 | -2.050197000000 |

|   |                 |                 |                 |
|---|-----------------|-----------------|-----------------|
| H | -2.134522000000 | -0.756705000000 | -1.862309000000 |
| H | -3.016194000000 | -1.558231000000 | -2.870882000000 |
| O | 1.506309000000  | 3.090631000000  | -0.408429000000 |
| H | 1.908237000000  | 2.226554000000  | -0.617225000000 |
| H | 1.696157000000  | 3.226281000000  | 0.525597000000  |

**(SA)(TA)(W)<sub>4</sub>**

|   |                 |                 |                 |
|---|-----------------|-----------------|-----------------|
| O | -2.208511000000 | -0.829051000000 | 1.057011000000  |
| O | -3.395725000000 | 1.699294000000  | 0.083056000000  |
| O | -5.117115000000 | -0.740018000000 | -0.998065000000 |
| O | -0.486216000000 | 0.177235000000  | -1.276438000000 |
| O | -4.827766000000 | -1.086412000000 | 1.199389000000  |
| O | -0.779102000000 | 2.069261000000  | -0.101161000000 |
| C | -2.909474000000 | -0.641002000000 | -0.147952000000 |
| C | -2.688078000000 | 0.776946000000  | -0.687465000000 |
| C | -4.387560000000 | -0.850992000000 | 0.109873000000  |
| C | -1.198165000000 | 1.079785000000  | -0.660395000000 |
| H | -2.566789000000 | -1.366903000000 | -0.889647000000 |
| H | -3.023687000000 | 0.807879000000  | -1.730444000000 |
| H | -2.861482000000 | -0.889068000000 | 1.771807000000  |
| H | -2.755876000000 | 2.330228000000  | 0.442222000000  |
| H | -6.049303000000 | -0.841820000000 | -0.756482000000 |
| H | 0.511621000000  | 0.333258000000  | -1.215723000000 |
| S | 2.897517000000  | 0.459658000000  | -0.038421000000 |
| O | 4.080142000000  | -0.367928000000 | 0.049806000000  |
| O | 2.061624000000  | 0.065062000000  | -1.218438000000 |
| O | 2.067268000000  | 0.503105000000  | 1.167849000000  |
| O | 3.391316000000  | 1.905449000000  | -0.311436000000 |
| H | 0.942847000000  | -0.836261000000 | 1.374322000000  |
| H | 2.704865000000  | 2.559301000000  | 0.054615000000  |
| O | 1.584455000000  | -2.480696000000 | -0.776096000000 |
| H | 1.808641000000  | -1.593499000000 | -1.178999000000 |
| H | 2.479244000000  | -2.858628000000 | -0.454975000000 |
| O | 1.572696000000  | 3.344742000000  | 0.792280000000  |
| H | 0.742217000000  | 3.022565000000  | 0.401270000000  |
| H | 1.612811000000  | 2.892117000000  | 1.643841000000  |
| O | 0.437357000000  | -1.666933000000 | 1.223303000000  |
| H | -0.505895000000 | -1.425098000000 | 1.161674000000  |
| H | 1.009279000000  | -2.198413000000 | 0.096563000000  |
| O | 3.917945000000  | -3.072428000000 | 0.015560000000  |
| H | 4.105748000000  | -3.506995000000 | 0.851938000000  |
| H | 4.198192000000  | -2.137079000000 | 0.105435000000  |

**(SA)<sub>2</sub>(AM)**

|   |                |                 |                 |
|---|----------------|-----------------|-----------------|
| S | 1.777048000000 | -0.362988000000 | -0.052525000000 |
|---|----------------|-----------------|-----------------|



|   |                 |                 |                 |
|---|-----------------|-----------------|-----------------|
| O | 2.406331000000  | 0.721953000000  | -0.804456000000 |
| O | 1.080505000000  | 0.182655000000  | 1.128180000000  |
| O | 2.964558000000  | -1.271358000000 | 0.485973000000  |
| O | 0.973771000000  | -1.287829000000 | -0.817015000000 |
| H | 1.458380000000  | 2.071523000000  | -0.449717000000 |
| H | 3.676475000000  | -0.699365000000 | 0.803116000000  |
| S | -2.086578000000 | -0.103346000000 | -0.009251000000 |
| O | -1.432703000000 | -0.421419000000 | 1.366331000000  |
| O | -3.492041000000 | -0.098731000000 | 0.144200000000  |
| O | -1.703703000000 | -1.315726000000 | -0.906722000000 |
| O | -1.430849000000 | 1.075120000000  | -0.553923000000 |
| H | -0.440250000000 | -0.256094000000 | 1.328932000000  |
| H | -0.716762000000 | -1.362787000000 | -0.991532000000 |
| N | 0.682760000000  | 2.658349000000  | -0.046537000000 |
| H | -0.198569000000 | 2.103635000000  | -0.181206000000 |
| H | 0.614610000000  | 3.570450000000  | -0.489513000000 |
| H | 0.852326000000  | 2.748204000000  | 0.953560000000  |

**(SA)<sub>2</sub>(AM)(W)<sub>1</sub>**

|   |                 |                 |                 |
|---|-----------------|-----------------|-----------------|
| S | 2.251136000000  | 0.142665000000  | -0.050056000000 |
| O | 2.259449000000  | -1.372837000000 | 0.314981000000  |
| O | 1.403363000000  | 0.823970000000  | 0.907117000000  |
| O | 1.535625000000  | 0.192522000000  | -1.438046000000 |
| O | 3.593483000000  | 0.552412000000  | -0.225699000000 |
| H | 1.324181000000  | -1.685697000000 | 0.406083000000  |
| H | 0.550654000000  | 0.136795000000  | -1.309292000000 |
| S | -1.418155000000 | -0.971470000000 | 0.091294000000  |
| O | -0.366339000000 | -1.954102000000 | 0.274399000000  |
| O | -2.589318000000 | -1.713473000000 | -0.698360000000 |
| O | -1.058155000000 | 0.110480000000  | -0.839810000000 |
| O | -1.997536000000 | -0.465842000000 | 1.325364000000  |
| H | -2.796131000000 | -2.538368000000 | -0.236786000000 |
| N | -0.997953000000 | 2.098915000000  | 1.340924000000  |
| H | -0.032158000000 | 1.853983000000  | 1.058483000000  |
| H | -1.505156000000 | 2.528387000000  | 0.546168000000  |
| H | -1.463847000000 | 1.189912000000  | 1.549114000000  |
| O | -2.302510000000 | 2.567280000000  | -1.053366000000 |
| H | -2.111683000000 | 1.648104000000  | -1.301690000000 |
| H | -3.145496000000 | 2.804994000000  | -1.445404000000 |
| H | -0.986869000000 | 2.707086000000  | 2.154397000000  |

**(SA)<sub>2</sub>(AM)(W)<sub>2</sub>**

|   |                |                 |                 |
|---|----------------|-----------------|-----------------|
| S | 2.445584000000 | 0.170349000000  | -0.141069000000 |
| O | 2.338043000000 | -1.139984000000 | -0.749358000000 |

|   |                 |                 |                 |
|---|-----------------|-----------------|-----------------|
| O | 3.985545000000  | 0.367265000000  | 0.224509000000  |
| O | 2.156317000000  | 1.311604000000  | -0.990075000000 |
| H | 4.343338000000  | -0.488242000000 | 0.498197000000  |
| S | -2.444498000000 | 0.155146000000  | -0.128213000000 |
| O | -2.262419000000 | -1.102303000000 | -0.823875000000 |
| O | -1.700782000000 | 0.253292000000  | 1.136922000000  |
| O | -3.960822000000 | 0.182564000000  | 0.372112000000  |
| O | -2.254472000000 | 1.338887000000  | -0.957658000000 |
| H | -0.894066000000 | 2.190566000000  | -0.359668000000 |
| O | 1.707776000000  | 0.254063000000  | 1.138519000000  |
| O | 0.022973000000  | -1.623226000000 | 1.503103000000  |
| N | -0.028986000000 | 2.445917000000  | 0.171431000000  |
| O | 0.018851000000  | -2.693177000000 | -0.723781000000 |
| H | -0.050797000000 | 1.895798000000  | 1.034289000000  |
| H | 0.826468000000  | 2.144129000000  | -0.354125000000 |
| H | -4.532083000000 | -0.021698000000 | -0.381486000000 |
| H | 0.806512000000  | -2.277321000000 | -1.113591000000 |
| H | -0.759515000000 | -2.259910000000 | -1.115089000000 |
| H | 0.793814000000  | -0.964393000000 | 1.430197000000  |
| H | 0.020751000000  | -2.167366000000 | 0.585715000000  |
| H | -0.776139000000 | -1.012227000000 | 1.459804000000  |
| H | -0.000837000000 | 3.439442000000  | 0.380924000000  |

**(SA)<sub>2</sub>(AM)(W)<sub>3</sub>**

|   |                 |                 |                 |
|---|-----------------|-----------------|-----------------|
| S | 2.076518000000  | -0.793624000000 | -0.183756000000 |
| O | 3.619389000000  | -0.914115000000 | -0.558006000000 |
| O | 1.462654000000  | -2.067270000000 | -0.524917000000 |
| O | 2.102699000000  | -0.502867000000 | 1.243997000000  |
| O | 1.539797000000  | 0.315764000000  | -0.980992000000 |
| H | 3.691456000000  | -1.253364000000 | -1.461361000000 |
| S | -1.793755000000 | 0.839729000000  | -0.157926000000 |
| O | -1.138146000000 | -0.242190000000 | -1.126713000000 |
| O | -3.195776000000 | 0.515003000000  | -0.201105000000 |
| O | -1.193643000000 | 0.531146000000  | 1.184154000000  |
| O | -1.392558000000 | 2.152048000000  | -0.608492000000 |
| H | -0.184694000000 | -0.027379000000 | -1.255156000000 |
| N | -0.887080000000 | -2.250118000000 | 0.979259000000  |
| H | -1.779975000000 | -2.464810000000 | 0.485582000000  |
| H | -0.756386000000 | -2.855660000000 | 1.784557000000  |
| H | -0.071150000000 | -2.326535000000 | 0.341637000000  |
| H | -0.951229000000 | -1.257066000000 | 1.277315000000  |
| O | 0.916823000000  | 1.775151000000  | 1.698391000000  |
| H | 1.522737000000  | 0.983412000000  | 1.611941000000  |
| H | 1.095358000000  | 2.388235000000  | 0.867475000000  |
| H | -0.016054000000 | 1.351260000000  | 1.538503000000  |

|   |                 |                 |                 |
|---|-----------------|-----------------|-----------------|
| H | -3.442249000000 | -1.309270000000 | -0.389545000000 |
| O | -3.341873000000 | -2.273862000000 | -0.274824000000 |
| H | -4.209212000000 | -2.610495000000 | -0.038197000000 |
| H | 1.645556000000  | 2.386218000000  | -0.946532000000 |
| O | 1.226372000000  | 3.079788000000  | -0.414458000000 |
| H | 0.295276000000  | 3.059833000000  | -0.700397000000 |

**(SA)<sub>2</sub>(AM)(W)<sub>4</sub>**

|   |                 |                 |                 |
|---|-----------------|-----------------|-----------------|
| S | -1.875855000000 | 0.632381000000  | 0.047334000000  |
| O | -0.909952000000 | 0.315872000000  | 1.117383000000  |
| O | -2.992128000000 | -0.305901000000 | 0.012483000000  |
| O | -1.086225000000 | 0.338441000000  | -1.312015000000 |
| O | -2.240063000000 | 2.030492000000  | 0.025062000000  |
| H | -0.107394000000 | 0.485596000000  | -1.158491000000 |
| O | -0.125080000000 | -2.239435000000 | 1.935298000000  |
| H | 0.679124000000  | -2.273458000000 | 1.390074000000  |
| H | -1.253365000000 | -2.546616000000 | 1.045908000000  |
| H | -0.272023000000 | -1.283979000000 | 2.037166000000  |
| O | -2.008468000000 | -2.650999000000 | 0.329708000000  |
| H | -1.516985000000 | -2.696754000000 | -0.571992000000 |
| H | -2.505440000000 | -1.763816000000 | 0.285547000000  |
| O | 0.004169000000  | 3.396418000000  | -0.997614000000 |
| H | 0.408022000000  | 2.886987000000  | -1.708386000000 |
| H | 0.644923000000  | 2.886924000000  | 0.504519000000  |
| H | -0.911666000000 | 3.073730000000  | -0.923580000000 |
| S | 2.108761000000  | -0.323939000000 | -0.095907000000 |
| O | 1.460372000000  | 0.711410000000  | -0.917626000000 |
| O | 1.531136000000  | -1.647997000000 | -0.314585000000 |
| O | 2.254193000000  | 0.052808000000  | 1.292053000000  |
| O | 3.614643000000  | -0.401753000000 | -0.618645000000 |
| H | 3.616340000000  | -0.766849000000 | -1.514036000000 |
| N | 0.783513000000  | 2.437195000000  | 1.443246000000  |
| H | -0.005265000000 | 1.768638000000  | 1.559698000000  |
| H | 1.627424000000  | 1.846550000000  | 1.443617000000  |
| H | -1.039350000000 | -1.602854000000 | -2.130417000000 |
| O | -0.698831000000 | -2.460776000000 | -1.836193000000 |
| H | 0.188196000000  | -2.248045000000 | -1.492817000000 |
| H | 0.806253000000  | 3.129883000000  | 2.185174000000  |

**(SA)<sub>2</sub>(DMA)**

|   |                |                 |                 |
|---|----------------|-----------------|-----------------|
| S | 1.324549000000 | -1.305294000000 | -0.122029000000 |
| O | 0.238653000000 | -2.010848000000 | -0.783416000000 |
| O | 2.143236000000 | -0.450502000000 | -0.960276000000 |
| O | 0.872598000000 | -0.602175000000 | 1.093811000000  |

|   |                 |                 |                 |
|---|-----------------|-----------------|-----------------|
| O | 2.342971000000  | -2.431843000000 | 0.358525000000  |
| H | -0.708615000000 | -0.583532000000 | 1.329652000000  |
| H | 1.832681000000  | -3.187505000000 | 0.681266000000  |
| S | -2.235499000000 | 0.138861000000  | 0.047495000000  |
| O | -1.708185000000 | -0.476703000000 | 1.378379000000  |
| O | -3.567100000000 | 0.576279000000  | 0.244246000000  |
| O | -1.236599000000 | 1.076012000000  | -0.430427000000 |
| O | -2.272325000000 | -1.069419000000 | -0.938182000000 |
| H | 0.373553000000  | 1.631015000000  | 0.200688000000  |
| H | -1.359306000000 | -1.447803000000 | -1.018207000000 |
| C | 1.125844000000  | 3.067718000000  | -1.051539000000 |
| N | 1.306589000000  | 1.996378000000  | -0.049001000000 |
| C | 2.055194000000  | 2.397494000000  | 1.160506000000  |
| H | 0.535395000000  | 2.668471000000  | -1.872459000000 |
| H | 2.101433000000  | 3.394069000000  | -1.405614000000 |
| H | 0.597261000000  | 3.899002000000  | -0.589450000000 |
| H | 1.767446000000  | 1.167056000000  | -0.481845000000 |
| H | 2.121318000000  | 1.532656000000  | 1.815981000000  |
| H | 1.526048000000  | 3.210299000000  | 1.654075000000  |
| H | 3.049629000000  | 2.726869000000  | 0.866370000000  |

**(SA)<sub>2</sub>(DMA)(W)<sub>1</sub>**

|   |                 |                 |                 |
|---|-----------------|-----------------|-----------------|
| S | 2.260880000000  | 0.271195000000  | -0.057615000000 |
| O | 1.861995000000  | -0.316888000000 | -1.447383000000 |
| O | 3.496548000000  | 0.949368000000  | -0.191266000000 |
| O | 1.101672000000  | 0.969874000000  | 0.461093000000  |
| O | 2.505429000000  | -0.990607000000 | 0.828098000000  |
| H | -1.293182000000 | 1.733441000000  | 0.706481000000  |
| H | 1.662028000000  | -1.510289000000 | 0.864972000000  |
| S | -1.052247000000 | -1.553294000000 | -0.027980000000 |
| O | -1.903548000000 | -0.809263000000 | 0.870079000000  |
| O | 0.124634000000  | -2.179437000000 | 0.555598000000  |
| O | -1.981794000000 | -2.749962000000 | -0.520807000000 |
| O | -0.714924000000 | -0.780704000000 | -1.246553000000 |
| H | -1.425835000000 | -3.415867000000 | -0.948710000000 |
| H | 0.888838000000  | -0.555288000000 | -1.440520000000 |
| C | -2.958902000000 | 1.814645000000  | -0.531975000000 |
| N | -1.495344000000 | 1.836576000000  | -0.317501000000 |
| C | -0.831065000000 | 3.051787000000  | -0.836189000000 |
| H | -3.345853000000 | 0.881899000000  | -0.129827000000 |
| H | -3.162025000000 | 1.879282000000  | -1.599289000000 |
| H | -3.402461000000 | 2.664786000000  | -0.017302000000 |
| H | -1.083641000000 | 0.990265000000  | -0.742930000000 |
| H | 0.232499000000  | 2.975676000000  | -0.627102000000 |
| H | -1.254146000000 | 3.921145000000  | -0.336593000000 |
| H | -1.003786000000 | 3.122676000000  | -1.908478000000 |

|   |                 |                |                |
|---|-----------------|----------------|----------------|
| O | -0.949023000000 | 1.403769000000 | 2.365450000000 |
| H | -1.279424000000 | 0.493701000000 | 2.320956000000 |
| H | 0.008149000000  | 1.308345000000 | 2.264868000000 |

**(SA)<sub>2</sub>(DMA)(W)<sub>2</sub>**

|   |                 |                 |                 |
|---|-----------------|-----------------|-----------------|
| S | -2.097595000000 | 0.318191000000  | -0.155085000000 |
| O | -3.047569000000 | -0.635148000000 | 0.610792000000  |
| O | -2.837186000000 | 1.418638000000  | -0.676923000000 |
| O | -0.956620000000 | 0.578482000000  | 0.694039000000  |
| O | -1.618586000000 | -0.509739000000 | -1.389157000000 |
| H | 1.362306000000  | 0.935281000000  | 0.961872000000  |
| H | -0.939765000000 | -1.200120000000 | -1.104560000000 |
| S | 1.376788000000  | -1.376535000000 | -0.240614000000 |
| O | 1.527045000000  | -0.305432000000 | -1.210978000000 |
| O | 1.534812000000  | -0.965188000000 | 1.142077000000  |
| O | 0.161785000000  | -2.175633000000 | -0.494226000000 |
| O | 2.591211000000  | -2.390893000000 | -0.456358000000 |
| H | -0.881619000000 | -2.564696000000 | 1.212655000000  |
| H | 2.524857000000  | -2.761442000000 | -1.347479000000 |
| C | 0.893361000000  | 2.852039000000  | 1.611911000000  |
| N | 1.424455000000  | 1.903910000000  | 0.610385000000  |
| C | 2.815060000000  | 2.186602000000  | 0.195256000000  |
| H | -0.128195000000 | 2.564351000000  | 1.844952000000  |
| H | 0.915116000000  | 3.854379000000  | 1.188240000000  |
| H | 1.514534000000  | 2.815770000000  | 2.504870000000  |
| H | 0.811016000000  | 1.920176000000  | -0.233934000000 |
| H | 3.109168000000  | 1.432137000000  | -0.529531000000 |
| H | 3.462873000000  | 2.149504000000  | 1.069036000000  |
| H | 2.849839000000  | 3.176796000000  | -0.254921000000 |
| O | 0.041605000000  | 2.074551000000  | -1.811055000000 |
| H | -0.919915000000 | 2.172638000000  | -1.803663000000 |
| H | 0.203656000000  | 1.151524000000  | -2.057016000000 |
| O | -1.327176000000 | -2.046506000000 | 1.901547000000  |
| H | -0.663604000000 | -1.368636000000 | 2.100625000000  |
| H | -2.463640000000 | -1.248415000000 | 1.186276000000  |

**(SA)<sub>2</sub>(DMA)(W)<sub>3</sub>**

|   |                 |                 |                 |
|---|-----------------|-----------------|-----------------|
| S | -1.471567000000 | -1.477579000000 | -0.073025000000 |
| O | -0.179740000000 | -2.095989000000 | 0.091438000000  |
| O | -2.646275000000 | -2.273592000000 | -0.206335000000 |
| O | -1.626417000000 | -0.508319000000 | 1.138604000000  |
| O | -1.414122000000 | -0.530524000000 | -1.309403000000 |
| H | -2.623061000000 | -0.114557000000 | 1.157031000000  |
| H | -0.538264000000 | 0.021968000000  | -1.261049000000 |

|   |                 |                 |                 |
|---|-----------------|-----------------|-----------------|
| S | 0.669077000000  | 1.762001000000  | 0.051008000000  |
| O | -0.611930000000 | 2.424330000000  | 0.098310000000  |
| O | 0.735078000000  | 0.730300000000  | -1.022457000000 |
| O | 1.846633000000  | 2.593580000000  | 0.064503000000  |
| O | 0.798657000000  | 0.899056000000  | 1.404921000000  |
| H | 3.354791000000  | 1.676534000000  | -0.021866000000 |
| H | -0.068840000000 | 0.477632000000  | 1.568175000000  |
| C | 2.624151000000  | -1.771868000000 | -1.374935000000 |
| N | 2.485758000000  | -1.276391000000 | 0.012733000000  |
| C | 2.723160000000  | -2.305867000000 | 1.044938000000  |
| H | 2.430601000000  | -0.939761000000 | -2.047205000000 |
| H | 1.890792000000  | -2.560206000000 | -1.530662000000 |
| H | 3.635074000000  | -2.149029000000 | -1.515667000000 |
| H | 1.528909000000  | -0.920987000000 | 0.114879000000  |
| H | 2.587239000000  | -1.852718000000 | 2.024360000000  |
| H | 3.738399000000  | -2.684172000000 | 0.942652000000  |
| H | 1.999025000000  | -3.105009000000 | 0.906193000000  |
| O | 4.049296000000  | 0.985403000000  | 0.023551000000  |
| H | 3.120200000000  | -0.459360000000 | 0.144402000000  |
| H | 4.693341000000  | 1.300732000000  | 0.662838000000  |
| O | -3.901963000000 | 0.414974000000  | 1.037386000000  |
| H | -3.790969000000 | 1.031358000000  | 0.260885000000  |
| H | -4.517561000000 | -0.277061000000 | 0.771950000000  |
| O | -3.160529000000 | 1.860060000000  | -1.022968000000 |
| H | -2.330765000000 | 2.248007000000  | -0.694081000000 |
| H | -2.862749000000 | 1.162790000000  | -1.620107000000 |

**(SA)<sub>2</sub>(DMA)(W)<sub>4</sub>**

|   |                 |                 |                 |
|---|-----------------|-----------------|-----------------|
| S | -1.436903000000 | -0.276375000000 | -1.175044000000 |
| O | -2.637536000000 | 0.474565000000  | -1.479912000000 |
| O | -0.440473000000 | 0.083323000000  | -2.355632000000 |
| O | -0.777478000000 | 0.153800000000  | 0.059799000000  |
| O | -1.614777000000 | -1.736437000000 | -1.190507000000 |
| H | 0.754624000000  | 1.795798000000  | -0.372519000000 |
| H | -0.949199000000 | -2.326576000000 | 0.002421000000  |
| S | 2.252411000000  | -0.733870000000 | -0.198292000000 |
| O | 1.777842000000  | -1.219004000000 | 1.112624000000  |
| O | 2.310447000000  | 0.711210000000  | -0.279227000000 |
| O | 3.791364000000  | -1.157313000000 | -0.281276000000 |
| O | 1.585640000000  | -1.412780000000 | -1.297378000000 |
| H | 3.834640000000  | -2.109246000000 | -0.445484000000 |
| H | 0.375986000000  | -0.445591000000 | -2.201167000000 |
| C | 1.424663000000  | 3.466797000000  | 0.614358000000  |
| N | 0.341034000000  | 2.558693000000  | 0.185615000000  |
| C | -0.759799000000 | 3.218482000000  | -0.552824000000 |

|   |                 |                 |                 |
|---|-----------------|-----------------|-----------------|
| H | 2.182909000000  | 2.872314000000  | 1.116518000000  |
| H | 1.013548000000  | 4.220148000000  | 1.283500000000  |
| H | 1.853526000000  | 3.941778000000  | -0.265417000000 |
| H | -0.020135000000 | 2.042562000000  | 1.000650000000  |
| H | -1.515256000000 | 2.474279000000  | -0.796011000000 |
| H | -0.354010000000 | 3.651758000000  | -1.464550000000 |
| H | -1.181283000000 | 4.001284000000  | 0.074896000000  |
| O | -3.900246000000 | -0.153869000000 | 0.980413000000  |
| H | -3.612532000000 | 0.141782000000  | 0.097473000000  |
| H | -4.635254000000 | -0.752807000000 | 0.824437000000  |
| O | -0.542081000000 | -2.577775000000 | 0.920714000000  |
| H | 0.372023000000  | -2.193384000000 | 0.924534000000  |
| H | -1.094737000000 | -1.983927000000 | 1.616192000000  |
| O | 0.418843000000  | 0.784556000000  | 2.485185000000  |
| H | 0.873257000000  | 0.878768000000  | 3.327520000000  |
| H | 0.940053000000  | 0.126929000000  | 1.976048000000  |
| O | -1.785615000000 | -1.088891000000 | 2.465527000000  |
| H | -1.183293000000 | -0.325358000000 | 2.518101000000  |
| H | -2.566852000000 | -0.760195000000 | 1.965115000000  |

**(SA)(TA)(AM)**

|   |                 |                 |                 |
|---|-----------------|-----------------|-----------------|
| O | -2.885489000000 | 1.632262000000  | -0.615311000000 |
| O | -2.177851000000 | -0.172077000000 | 1.525749000000  |
| O | -0.035222000000 | -0.424035000000 | -1.102895000000 |
| O | -4.605775000000 | -1.148058000000 | -0.904399000000 |
| O | -0.236919000000 | 1.655333000000  | -0.279558000000 |
| O | -4.801992000000 | -0.513226000000 | 1.235464000000  |
| C | -2.210452000000 | 0.425561000000  | -0.799221000000 |
| C | -2.616834000000 | -0.602063000000 | 0.270831000000  |
| C | -0.706625000000 | 0.613132000000  | -0.709797000000 |
| C | -4.124848000000 | -0.742013000000 | 0.272579000000  |
| H | -2.456516000000 | 0.029120000000  | -1.786164000000 |
| H | -2.175427000000 | -1.572866000000 | 0.019452000000  |
| H | -2.355726000000 | 2.166695000000  | -0.009329000000 |
| H | -2.960260000000 | -0.049118000000 | 2.081206000000  |
| H | 0.968443000000  | -0.286646000000 | -1.006856000000 |
| H | -5.570008000000 | -1.192367000000 | -0.831163000000 |
| S | 3.273781000000  | -0.654288000000 | 0.122278000000  |
| O | 2.800752000000  | -1.968112000000 | 0.441725000000  |
| O | 2.459489000000  | 0.056460000000  | -0.890092000000 |
| O | 3.550653000000  | 0.248496000000  | 1.243174000000  |
| O | 4.717597000000  | -0.822719000000 | -0.553535000000 |
| H | 2.820424000000  | 1.582954000000  | 0.919394000000  |
| H | 4.726443000000  | -1.674279000000 | -1.010293000000 |
| N | 2.281750000000  | 2.420598000000  | 0.512602000000  |

|   |                |                |                 |
|---|----------------|----------------|-----------------|
| H | 2.783449000000 | 2.729973000000 | -0.317076000000 |
| H | 2.198946000000 | 3.183116000000 | 1.178670000000  |
| H | 1.338092000000 | 2.085549000000 | 0.208553000000  |

**(SA)(TA)(AM)(W)<sub>1</sub>**

|   |                 |                 |                 |
|---|-----------------|-----------------|-----------------|
| O | -2.980219000000 | 1.438972000000  | -0.972548000000 |
| O | -2.013961000000 | -0.074939000000 | 1.342182000000  |
| O | -0.074805000000 | -0.600427000000 | -1.156299000000 |
| O | -4.693590000000 | -1.282544000000 | -0.672121000000 |
| O | -0.340756000000 | 1.625196000000  | -1.005386000000 |
| O | -4.642165000000 | -0.311268000000 | 1.347790000000  |
| C | -2.274017000000 | 0.237586000000  | -1.041990000000 |
| C | -2.581804000000 | -0.632610000000 | 0.184661000000  |
| C | -0.775275000000 | 0.490519000000  | -1.075857000000 |
| C | -4.082592000000 | -0.717752000000 | 0.368496000000  |
| H | -2.554251000000 | -0.318483000000 | -1.942098000000 |
| H | -2.179887000000 | -1.636212000000 | 0.021983000000  |
| H | -2.326649000000 | 2.145578000000  | -0.873734000000 |
| H | -2.739491000000 | 0.243040000000  | 1.900614000000  |
| H | 0.927498000000  | -0.404096000000 | -1.136483000000 |
| H | -5.646645000000 | -1.269889000000 | -0.502051000000 |
| S | 3.255495000000  | -0.540605000000 | -0.034916000000 |
| O | 2.580035000000  | -1.454606000000 | 0.867007000000  |
| O | 2.379517000000  | 0.019025000000  | -1.076845000000 |
| O | 4.022764000000  | 0.503711000000  | 0.626385000000  |
| O | 4.284157000000  | -1.415651000000 | -0.889641000000 |
| H | 2.870918000000  | 1.969758000000  | 0.503953000000  |
| H | 4.833587000000  | -1.917837000000 | -0.272261000000 |
| N | 1.897708000000  | 2.314135000000  | 0.559775000000  |
| H | 1.442488000000  | 2.222380000000  | -0.356326000000 |
| H | 1.377589000000  | 1.634771000000  | 1.194625000000  |
| H | 1.847585000000  | 3.267733000000  | 0.903547000000  |
| O | 0.727898000000  | 0.368649000000  | 1.968250000000  |
| H | -0.196995000000 | 0.140985000000  | 1.781089000000  |
| H | 1.263511000000  | -0.422275000000 | 1.775319000000  |

**(SA)(TA)(AM)(W)<sub>2</sub>**

|   |                |                 |                 |
|---|----------------|-----------------|-----------------|
| O | 3.164992000000 | -1.595941000000 | 0.879737000000  |
| O | 2.323240000000 | 1.176884000000  | 0.513970000000  |
| O | 0.209631000000 | -0.811708000000 | -0.936856000000 |
| O | 4.813154000000 | -0.269373000000 | -1.585930000000 |
| O | 0.533257000000 | -1.609282000000 | 1.138096000000  |
| O | 4.941068000000 | 1.142454000000  | 0.150890000000  |
| C | 2.432149000000 | -1.130007000000 | -0.212245000000 |



|   |                 |                 |                 |
|---|-----------------|-----------------|-----------------|
| C | 2.791416000000  | 0.332996000000  | -0.505702000000 |
| C | 0.939658000000  | -1.213107000000 | 0.062726000000  |
| C | 4.297946000000  | 0.461214000000  | -0.597006000000 |
| H | 2.653313000000  | -1.726821000000 | -1.102940000000 |
| H | 2.345571000000  | 0.626594000000  | -1.459719000000 |
| H | 2.531267000000  | -1.782906000000 | 1.586846000000  |
| H | 3.092462000000  | 1.478933000000  | 1.020316000000  |
| H | -0.782292000000 | -0.908237000000 | -0.724886000000 |
| H | 5.775945000000  | -0.170428000000 | -1.559911000000 |
| S | -3.323999000000 | -0.246305000000 | -0.507326000000 |
| O | -2.210409000000 | -1.190235000000 | -0.282489000000 |
| O | -3.008688000000 | 0.750365000000  | -1.513353000000 |
| O | -4.515882000000 | -1.126132000000 | -1.107392000000 |
| O | -3.863185000000 | 0.248207000000  | 0.742688000000  |
| H | -4.322725000000 | -1.295802000000 | -2.039269000000 |
| H | -2.652160000000 | -0.239779000000 | 2.011177000000  |
| N | -1.699982000000 | -0.363962000000 | 2.397191000000  |
| H | -1.711985000000 | -0.470271000000 | 3.406352000000  |
| H | -1.118283000000 | 0.485414000000  | 2.100244000000  |
| H | -1.261115000000 | -1.173818000000 | 1.944430000000  |
| O | -0.305941000000 | 1.701192000000  | 1.507504000000  |
| H | 0.573389000000  | 1.532735000000  | 1.135411000000  |
| H | -0.802593000000 | 2.231261000000  | 0.846902000000  |
| O | -1.846812000000 | 2.993613000000  | -0.322602000000 |
| H | -2.342529000000 | 2.303459000000  | -0.800209000000 |
| H | -1.536825000000 | 3.611330000000  | -0.988611000000 |

**(SA)(TA)(AM)(W)<sub>3</sub>**

|   |                 |                 |                 |
|---|-----------------|-----------------|-----------------|
| O | 1.083870000000  | -0.721972000000 | 1.489545000000  |
| O | 1.559938000000  | 0.413873000000  | -1.241529000000 |
| O | 0.130144000000  | -2.257385000000 | -1.551491000000 |
| O | 4.220029000000  | -1.149552000000 | 0.463659000000  |
| O | -0.882388000000 | -2.323867000000 | 0.438136000000  |
| O | 3.636181000000  | 1.001979000000  | 0.262332000000  |
| C | 1.360856000000  | -1.469605000000 | 0.343989000000  |
| C | 2.201765000000  | -0.690926000000 | -0.682009000000 |
| C | 0.074374000000  | -2.053869000000 | -0.241674000000 |
| C | 3.417777000000  | -0.156088000000 | 0.055059000000  |
| H | 1.962738000000  | -2.328459000000 | 0.659549000000  |
| H | 2.545810000000  | -1.390795000000 | -1.451859000000 |
| H | 0.611184000000  | 0.099130000000  | 1.242657000000  |
| H | 0.601900000000  | 0.258755000000  | -1.346933000000 |
| H | -0.776617000000 | -2.460350000000 | -1.860751000000 |
| H | 4.947409000000  | -0.750965000000 | 0.962338000000  |
| S | -1.430782000000 | 1.506894000000  | -0.050774000000 |

|   |                 |                 |                 |
|---|-----------------|-----------------|-----------------|
| O | -1.125933000000 | 0.352061000000  | -0.936669000000 |
| O | -2.861637000000 | 1.609444000000  | 0.181005000000  |
| O | -0.617861000000 | 1.436789000000  | 1.168810000000  |
| O | -1.004332000000 | 2.796003000000  | -0.802794000000 |
| H | -1.387071000000 | 0.201736000000  | 2.556938000000  |
| H | -0.004137000000 | 2.955779000000  | -0.654023000000 |
| N | -3.408774000000 | -1.054201000000 | 0.747353000000  |
| H | -3.007143000000 | -1.629563000000 | -0.001795000000 |
| H | -4.326460000000 | -1.399323000000 | 1.011308000000  |
| H | -3.459217000000 | -0.068712000000 | 0.419700000000  |
| O | -1.637754000000 | -0.719223000000 | 2.738445000000  |
| H | -0.863329000000 | -1.218010000000 | 2.431510000000  |
| H | -2.742773000000 | -1.045440000000 | 1.578290000000  |
| O | -2.522899000000 | -1.637487000000 | -2.050197000000 |
| H | -2.134522000000 | -0.756705000000 | -1.862309000000 |
| H | -3.016194000000 | -1.558231000000 | -2.870882000000 |
| O | 1.506309000000  | 3.090631000000  | -0.408429000000 |
| H | 1.908237000000  | 2.226554000000  | -0.617225000000 |
| H | 1.696157000000  | 3.226281000000  | 0.525597000000  |

**(SA)(TA)(AM)(W)<sub>4</sub>**

|   |                 |                 |                 |
|---|-----------------|-----------------|-----------------|
| O | 2.498228000000  | -0.564114000000 | 1.286650000000  |
| O | 3.478283000000  | -1.279028000000 | -1.376996000000 |
| O | 4.930750000000  | 1.428745000000  | -0.390101000000 |
| O | 0.383762000000  | 0.429940000000  | -0.983532000000 |
| O | 5.086015000000  | -0.037575000000 | 1.299655000000  |
| O | 0.867355000000  | -1.733661000000 | -1.326395000000 |
| C | 2.944286000000  | 0.348198000000  | 0.317544000000  |
| C | 2.659326000000  | -0.186351000000 | -1.095276000000 |
| C | 4.437707000000  | 0.546543000000  | 0.478092000000  |
| C | 1.191092000000  | -0.572949000000 | -1.157177000000 |
| H | 2.441798000000  | 1.311049000000  | 0.452254000000  |
| H | 2.843617000000  | 0.615107000000  | -1.816851000000 |
| H | 3.280051000000  | -0.916829000000 | 1.738169000000  |
| H | 2.916653000000  | -2.066727000000 | -1.370003000000 |
| H | 5.887475000000  | 1.484263000000  | -0.251463000000 |
| H | -0.623899000000 | 0.142727000000  | -0.905067000000 |
| S | -2.666633000000 | 0.258207000000  | 0.507369000000  |
| O | -2.002262000000 | -0.197769000000 | -0.752268000000 |
| O | -1.744639000000 | 1.059053000000  | 1.311017000000  |
| O | -3.853600000000 | 1.163493000000  | 0.057090000000  |
| O | -3.269968000000 | -0.851483000000 | 1.211112000000  |
| H | -3.511611000000 | 2.028414000000  | -0.341982000000 |
| H | -1.118439000000 | -2.317271000000 | 0.824138000000  |
| N | -1.360412000000 | -2.894656000000 | -0.013279000000 |

|   |                 |                 |                 |
|---|-----------------|-----------------|-----------------|
| H | -2.336917000000 | -2.712688000000 | -0.330960000000 |
| H | -0.696666000000 | -2.590708000000 | -0.739775000000 |
| H | -1.232496000000 | -3.881550000000 | 0.191523000000  |
| O | -3.981621000000 | -2.460828000000 | -0.952964000000 |
| H | -4.211384000000 | -1.959103000000 | -0.153673000000 |
| H | -3.839536000000 | -1.771335000000 | -1.612781000000 |
| O | -0.382977000000 | 3.077697000000  | -0.074376000000 |
| H | 0.137803000000  | 2.561627000000  | -0.699503000000 |
| H | -0.697557000000 | 2.413721000000  | 0.565539000000  |
| O | -2.930013000000 | 3.377720000000  | -0.914922000000 |
| H | -3.326209000000 | 4.169265000000  | -0.540447000000 |
| H | -1.971505000000 | 3.411878000000  | -0.692617000000 |
| O | -0.223903000000 | -1.297714000000 | 1.927479000000  |
| H | 0.700320000000  | -1.059717000000 | 1.758697000000  |
| H | -0.690218000000 | -0.459305000000 | 2.069156000000  |

**(SA)(TA)(DMA)**

|   |                 |                 |                 |
|---|-----------------|-----------------|-----------------|
| O | 2.333570000000  | -1.297011000000 | 1.472544000000  |
| O | 2.250533000000  | 1.230034000000  | 0.040466000000  |
| O | -0.089407000000 | -0.661177000000 | -1.055375000000 |
| O | 4.594345000000  | -1.277412000000 | -0.906843000000 |
| O | -0.237308000000 | -0.942701000000 | 1.161491000000  |
| O | 4.785479000000  | 0.598763000000  | 0.305221000000  |
| C | 1.893771000000  | -1.171541000000 | 0.151898000000  |
| C | 2.629418000000  | -0.010787000000 | -0.519859000000 |
| C | 0.386582000000  | -0.915268000000 | 0.076742000000  |
| C | 4.121394000000  | -0.178623000000 | -0.322806000000 |
| H | 2.103230000000  | -2.083092000000 | -0.419868000000 |
| H | 2.395736000000  | -0.010870000000 | -1.586456000000 |
| H | 1.536852000000  | -1.287071000000 | 2.023704000000  |
| H | 2.980018000000  | 1.509322000000  | 0.616112000000  |
| H | -1.574799000000 | -0.878906000000 | -1.281346000000 |
| H | 5.537045000000  | -1.347598000000 | -0.697215000000 |
| S | -3.312857000000 | -0.565783000000 | -0.091672000000 |
| O | -4.703830000000 | -0.790913000000 | -0.239321000000 |
| O | -2.586650000000 | -1.032820000000 | -1.380950000000 |
| O | -2.846614000000 | 0.777829000000  | 0.217781000000  |
| O | -2.766984000000 | -1.513440000000 | 1.017115000000  |
| H | -1.099132000000 | 1.191393000000  | 0.263835000000  |
| H | -1.787897000000 | -1.305960000000 | 1.158660000000  |
| C | -0.667105000000 | 2.476784000000  | -1.258602000000 |
| N | -0.481655000000 | 2.012010000000  | 0.135693000000  |
| C | -0.869268000000 | 3.012446000000  | 1.153305000000  |
| H | -0.350318000000 | 1.675492000000  | -1.921956000000 |
| H | -0.067033000000 | 3.370530000000  | -1.418404000000 |

|   |                 |                |                 |
|---|-----------------|----------------|-----------------|
| H | -1.724271000000 | 2.686513000000 | -1.406776000000 |
| H | 0.496470000000  | 1.709193000000 | 0.260478000000  |
| H | -0.702802000000 | 2.588400000000 | 2.140675000000  |
| H | -1.927122000000 | 3.231203000000 | 1.024300000000  |
| H | -0.272506000000 | 3.912616000000 | 1.020068000000  |

**(SA)(TA)(DMA)(W)<sub>1</sub>**

|   |                 |                 |                 |
|---|-----------------|-----------------|-----------------|
| O | 0.805909000000  | -0.104089000000 | -1.125020000000 |
| O | 1.389294000000  | -0.969954000000 | 1.620005000000  |
| O | 3.799018000000  | -1.824057000000 | -0.481500000000 |
| O | -0.814778000000 | -2.815610000000 | -0.474808000000 |
| O | 3.309416000000  | 0.358743000000  | -0.460325000000 |
| O | -1.118178000000 | -1.795414000000 | 1.493633000000  |
| C | 1.526171000000  | -1.237549000000 | -0.758186000000 |
| C | 1.080067000000  | -1.855513000000 | 0.578251000000  |
| C | 2.962397000000  | -0.784660000000 | -0.564627000000 |
| C | -0.412433000000 | -2.158823000000 | 0.571424000000  |
| H | 1.495171000000  | -2.015019000000 | -1.527639000000 |
| H | 1.610138000000  | -2.809169000000 | 0.699252000000  |
| H | -0.172070000000 | -0.246010000000 | -1.185886000000 |
| H | 0.639545000000  | -0.984736000000 | 2.231467000000  |
| H | 4.683856000000  | -1.478479000000 | -0.295707000000 |
| H | -1.838262000000 | -2.765526000000 | -0.525782000000 |
| S | -2.181605000000 | 1.167817000000  | -0.181251000000 |
| O | -3.570301000000 | 1.172639000000  | 0.175095000000  |
| O | -1.824335000000 | -0.007167000000 | -1.014715000000 |
| O | -1.600276000000 | 2.405361000000  | -0.672722000000 |
| O | -1.321246000000 | 0.954686000000  | 1.180912000000  |
| H | 0.052625000000  | 2.533708000000  | 0.100562000000  |
| H | -1.471491000000 | 0.044388000000  | 1.493066000000  |
| C | 1.788850000000  | 3.141553000000  | -0.831095000000 |
| N | 1.063231000000  | 2.313886000000  | 0.155064000000  |
| C | 1.575307000000  | 2.421802000000  | 1.534655000000  |
| H | 1.334774000000  | 2.980359000000  | -1.806243000000 |
| H | 2.829860000000  | 2.828625000000  | -0.846791000000 |
| H | 1.703288000000  | 4.189177000000  | -0.548503000000 |
| H | 1.115884000000  | 1.324084000000  | -0.160554000000 |
| H | 0.931682000000  | 1.831486000000  | 2.180743000000  |
| H | 1.562878000000  | 3.466690000000  | 1.840223000000  |
| H | 2.589230000000  | 2.027592000000  | 1.554484000000  |
| O | -3.288738000000 | -2.294380000000 | -0.710700000000 |
| H | -3.069689000000 | -1.364314000000 | -0.924242000000 |
| H | -3.782791000000 | -2.252049000000 | 0.114725000000  |

**(SA)(TA)(AM)(W)<sub>2</sub>**

|   |                 |                 |                 |
|---|-----------------|-----------------|-----------------|
| O | -2.646708000000 | -0.133286000000 | 1.366047000000  |
| O | -3.268412000000 | 1.434855000000  | -1.039582000000 |
| O | -5.356193000000 | -1.020252000000 | -0.773743000000 |
| O | -0.662241000000 | -0.982633000000 | -0.967132000000 |
| O | -5.284068000000 | 0.026839000000  | 1.207143000000  |
| O | -0.627373000000 | 1.262129000000  | -0.984736000000 |
| C | -3.225343000000 | -0.632717000000 | 0.189197000000  |
| C | -2.731352000000 | 0.146035000000  | -1.037008000000 |
| C | -4.730991000000 | -0.499205000000 | 0.282710000000  |
| C | -1.211680000000 | 0.199141000000  | -0.997963000000 |
| H | -2.964925000000 | -1.687877000000 | 0.071588000000  |
| H | -3.034526000000 | -0.396199000000 | -1.938875000000 |
| H | -3.335553000000 | 0.343425000000  | 1.852691000000  |
| H | -2.523760000000 | 2.047560000000  | -0.958979000000 |
| H | -6.305151000000 | -0.861977000000 | -0.665809000000 |
| H | 0.347594000000  | -0.917616000000 | -0.928633000000 |
| S | 2.750220000000  | -1.460471000000 | 0.055913000000  |
| O | 1.892044000000  | -0.755014000000 | -0.908548000000 |
| O | 2.130652000000  | -1.662574000000 | 1.352641000000  |
| O | 2.881862000000  | -2.909573000000 | -0.615549000000 |
| O | 4.082529000000  | -0.887246000000 | 0.112819000000  |
| H | 3.343704000000  | -3.486781000000 | 0.007694000000  |
| H | 4.207129000000  | 0.639155000000  | -0.968803000000 |
| C | 2.816252000000  | 1.812256000000  | 1.500751000000  |
| N | 1.817515000000  | 1.880485000000  | 0.408641000000  |
| C | 1.562857000000  | 3.256199000000  | -0.061796000000 |
| H | 2.920037000000  | 0.777107000000  | 1.818162000000  |
| H | 2.459458000000  | 2.419442000000  | 2.330385000000  |
| H | 3.765617000000  | 2.185762000000  | 1.123172000000  |
| H | 0.949479000000  | 1.413266000000  | 0.736824000000  |
| H | 0.810493000000  | 3.217479000000  | -0.844053000000 |
| H | 2.497373000000  | 3.659247000000  | -0.447174000000 |
| H | 1.207334000000  | 3.855108000000  | 0.774564000000  |
| O | 3.970574000000  | 1.496351000000  | -1.367264000000 |
| H | 3.880451000000  | 1.313367000000  | -2.306308000000 |
| H | 2.165120000000  | 1.328492000000  | -0.387456000000 |
| O | 0.152362000000  | 0.276531000000  | 1.883310000000  |
| H | -0.780201000000 | 0.042281000000  | 1.771306000000  |
| H | 0.665525000000  | -0.546374000000 | 1.826007000000  |

**(SA)(TA)(DMA)(W)<sub>3</sub>**

|   |                |                 |                 |
|---|----------------|-----------------|-----------------|
| O | 2.769987000000 | -1.289852000000 | -0.736750000000 |
| O | 4.005244000000 | 1.392521000000  | -0.729729000000 |
| O | 5.793753000000 | -0.606403000000 | 1.026473000000  |

|   |                 |                 |                 |
|---|-----------------|-----------------|-----------------|
| O | 1.214146000000  | 0.487113000000  | 1.279421000000  |
| O | 5.394779000000  | -1.620955000000 | -0.932600000000 |
| O | 1.416102000000  | 1.866755000000  | -0.479474000000 |
| C | 3.543779000000  | -0.736508000000 | 0.292772000000  |
| C | 3.364635000000  | 0.786503000000  | 0.351677000000  |
| C | 5.005215000000  | -1.048244000000 | 0.045073000000  |
| C | 1.879091000000  | 1.102870000000  | 0.347740000000  |
| H | 3.241044000000  | -1.168630000000 | 1.250300000000  |
| H | 3.785476000000  | 1.150340000000  | 1.295880000000  |
| H | 3.368906000000  | -1.551534000000 | -1.451503000000 |
| H | 3.327648000000  | 1.846116000000  | -1.250658000000 |
| H | 6.710239000000  | -0.797676000000 | 0.779691000000  |
| H | 0.219975000000  | 0.701724000000  | 1.222039000000  |
| S | -1.879360000000 | 1.427492000000  | -0.149083000000 |
| O | -1.270947000000 | 1.046824000000  | 1.154163000000  |
| O | -1.598834000000 | 0.433128000000  | -1.175282000000 |
| O | -3.284971000000 | 1.747897000000  | -0.008453000000 |
| O | -1.179137000000 | 2.770631000000  | -0.572835000000 |
| H | -4.044875000000 | 0.089532000000  | -0.223371000000 |
| H | -0.214005000000 | 2.584144000000  | -0.631961000000 |
| C | -5.428640000000 | -1.388888000000 | 0.232907000000  |
| N | -4.225302000000 | -0.898991000000 | -0.468256000000 |
| C | -4.295136000000 | -1.028166000000 | -1.939524000000 |
| H | -5.275402000000 | -1.249614000000 | 1.299721000000  |
| H | -5.556054000000 | -2.446401000000 | 0.008389000000  |
| H | -6.299174000000 | -0.828942000000 | -0.104749000000 |
| H | -3.395373000000 | -1.455182000000 | -0.108501000000 |
| H | -3.377761000000 | -0.622859000000 | -2.358043000000 |
| H | -5.156669000000 | -0.473025000000 | -2.306866000000 |
| H | -4.396037000000 | -2.082340000000 | -2.191681000000 |
| O | -3.165326000000 | -0.532521000000 | 2.431534000000  |
| H | -2.534754000000 | 0.142400000000  | 2.116786000000  |
| H | -3.377494000000 | -0.291954000000 | 3.336714000000  |
| O | -2.335295000000 | -2.471177000000 | 0.599515000000  |
| H | -2.325789000000 | -2.076974000000 | 1.483521000000  |
| H | -1.432531000000 | -2.366860000000 | 0.228674000000  |
| O | -0.074747000000 | -1.851829000000 | -0.739593000000 |
| H | -0.397531000000 | -0.971321000000 | -0.989236000000 |
| H | 0.885337000000  | -1.780330000000 | -0.657011000000 |

**(SA)(TA)(DMA)(W)<sub>4</sub>**

|   |                |                 |                 |
|---|----------------|-----------------|-----------------|
| O | 1.165141000000 | -0.615074000000 | 1.368668000000  |
| O | 1.735338000000 | 0.541100000000  | -1.181687000000 |
| O | 0.661591000000 | -2.539886000000 | -1.580944000000 |
| O | 4.472839000000 | -1.042603000000 | 0.382021000000  |

|   |                 |                 |                 |
|---|-----------------|-----------------|-----------------|
| O | -0.671096000000 | -2.175060000000 | 0.170147000000  |
| O | 3.847087000000  | 1.102957000000  | 0.321477000000  |
| C | 1.595362000000  | -1.402213000000 | 0.294378000000  |
| C | 2.428947000000  | -0.571019000000 | -0.699773000000 |
| C | 0.403112000000  | -2.080218000000 | -0.382077000000 |
| C | 3.641986000000  | -0.043366000000 | 0.043729000000  |
| H | 2.233848000000  | -2.198086000000 | 0.689171000000  |
| H | 2.776855000000  | -1.225173000000 | -1.505207000000 |
| H | 0.522841000000  | 0.024498000000  | 1.004838000000  |
| H | 0.895997000000  | 0.286995000000  | -1.626660000000 |
| H | -0.231690000000 | -2.713043000000 | -2.032738000000 |
| H | 5.210551000000  | -0.653496000000 | 0.872660000000  |
| S | -1.657497000000 | 0.619834000000  | -1.042652000000 |
| O | -0.776790000000 | 0.174284000000  | -2.136139000000 |
| O | -2.736861000000 | -0.307998000000 | -0.760099000000 |
| O | -0.868636000000 | 0.980528000000  | 0.147422000000  |
| O | -2.357303000000 | 1.945332000000  | -1.506596000000 |
| H | -1.267199000000 | 0.231795000000  | 2.298754000000  |
| H | -1.670350000000 | 2.672109000000  | -1.476705000000 |
| C | -1.627272000000 | -1.632049000000 | 3.103723000000  |
| N | -1.941469000000 | -0.546570000000 | 2.154152000000  |
| C | -3.315920000000 | -0.011988000000 | 2.256842000000  |
| H | -0.602882000000 | -1.946831000000 | 2.918301000000  |
| H | -2.308991000000 | -2.462778000000 | 2.932774000000  |
| H | -1.738421000000 | -1.255963000000 | 4.119180000000  |
| H | -1.773778000000 | -0.884890000000 | 1.195881000000  |
| H | -3.432584000000 | 0.768788000000  | 1.510323000000  |
| H | -3.462287000000 | 0.383982000000  | 3.260062000000  |
| H | -4.023264000000 | -0.813533000000 | 2.055407000000  |
| O | -1.700666000000 | -2.453618000000 | -2.595367000000 |
| H | -2.196969000000 | -2.297562000000 | -1.776965000000 |
| H | -1.559123000000 | -1.544097000000 | -2.905729000000 |
| O | 1.317508000000  | 2.631148000000  | 0.645850000000  |
| H | 2.222357000000  | 2.909141000000  | 0.825957000000  |
| H | 1.433949000000  | 1.856779000000  | 0.057657000000  |
| O | -0.404870000000 | 3.706414000000  | -1.310800000000 |
| H | 0.143283000000  | 3.442231000000  | -0.547102000000 |
| H | 0.188260000000  | 3.694183000000  | -2.067749000000 |
| O | -0.055048000000 | 1.440602000000  | 2.891729000000  |
| H | 0.761456000000  | 0.985848000000  | 3.127669000000  |
| H | 0.205214000000  | 1.987869000000  | 2.127187000000  |
